# Supplementary material for: Quality of newborn care: adherence to guidelines for parenteral nutrition in preterm infants in four European countries
Source: PubMed Central journal article supplement — BMJ Open. 2013 Sep 18;3(9):e003478. doi: 10.1136/bmjopen-2013-003478 (PMC3780296; doi:10.1136/bmjopen-2013-003478), 2013-09-18
Supplement: bmjopen-2013-003478.draft_revisions.pdf [file bmjopen-2013-003478.draft_revisions.pdf]

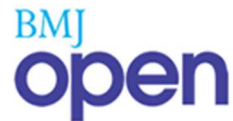

**Quality of newborn care: Adherence to guidelines for  
parenteral nutrition in preterm infants in in Four European  
Countries**

|                                 |                                                                                                                                                                                                                                                                                                                                                                                                                                                                                                                      |
|---------------------------------|----------------------------------------------------------------------------------------------------------------------------------------------------------------------------------------------------------------------------------------------------------------------------------------------------------------------------------------------------------------------------------------------------------------------------------------------------------------------------------------------------------------------|
| Journal:                        | <i>BMJ Open</i>                                                                                                                                                                                                                                                                                                                                                                                                                                                                                                      |
| Manuscript ID:                  | bmjopen-2013-003478                                                                                                                                                                                                                                                                                                                                                                                                                                                                                                  |
| Article Type:                   | Research                                                                                                                                                                                                                                                                                                                                                                                                                                                                                                             |
| Date Submitted by the Author:   | 26-Jun-2013                                                                                                                                                                                                                                                                                                                                                                                                                                                                                                          |
| Complete List of Authors:       | Lapillonne, Alexandre; Paris Descartes University, Assistance Publique-Hôpitaux de Paris, Necker hospital, Department of Neonatal Medicine<br>Carnielli, Virgilio; Polytechnic University of Marche and Salesi's Children Hospital, Azienda Ospedaliero Universitaria Ospedali Riuniti, Division of Neonatology, Department of Clinical Sciences<br>Embleton, Nicholas; Newcastle upon Tyne Hospitals NHS Foundation Trust, Newcastle Neonatal Service<br>Mihatsch, Walter; Pediatric Clinic Harlaching, Neonatology |
| <b>Primary Subject Heading</b>: | Paediatrics                                                                                                                                                                                                                                                                                                                                                                                                                                                                                                          |
| Secondary Subject Heading:      | Nutrition and metabolism, Intensive care                                                                                                                                                                                                                                                                                                                                                                                                                                                                             |
| Keywords:                       | NEONATOLOGY, NUTRITION & DIETETICS, Paediatric intensive & critical care < PAEDIATRICS                                                                                                                                                                                                                                                                                                                                                                                                                               |
|                                 |                                                                                                                                                                                                                                                                                                                                                                                                                                                                                                                      |

SCHOLARONE™  
Manuscripts

Only

1  
2  
3 **Quality of newborn care: Adherence to guidelines for parenteral nutrition in preterm**  
4 **infants in Four European Countries**  
5  
6  
7

8 **Address correspondence to:**

9  
10 Professor Alexandre Lapillonne, Department of Neonatology, APHP Necker-Enfants Malades  
11 hospital, 149 Boulevard Sevres, 75014 Paris, France,  
12

13 Mail: [1](mailto:lapillonne@aphp.fr); tel: +33 (1) 71396542  
14  
15

16 **Authors:** Alexandre Lapillonne<sup>a,b</sup>, MD, PhD, Virgilio Paolo Carnielli<sup>c</sup>, MD, PhD, Nicholas David  
17 Embleton<sup>d</sup>, MBBS, MD, Walter Mihatsch<sup>e</sup>, MD  
18  
19

20  
21 **Author affiliations:**

22 <sup>a</sup>Paris Descartes University, APHP Necker hospital, Paris France; <sup>b</sup>CNRC, Baylor College of Medicine,  
23 Houston, TX, USA; <sup>c</sup>Division of Neonatology, Department of Clinical Sciences, Polytechnic University  
24 of Marche and Salesi's Children Hospital, Azienda Ospedaliero Universitaria Ospedali Riuniti, Ancona,  
25 Italy; <sup>d</sup>Newcastle Neonatal Service, Newcastle upon Tyne Hospitals NHS Foundation Trust, Newcastle  
26 upon Tyne, United Kingdom; <sup>e</sup>Pediatric Clinic Harlaching, Munich, Germany  
27  
28  
29  
30  
31

32 **Running title:** Adherence to guidelines for parenteral nutrition in preterm infants

33 **Key Words:** infant, premature, nutrition survey, feeding methods, parenteral nutrition, guideline  
34  
35  
36  
37  
38

39 **Word count (text)** = 2383

40 **Word count (Abstract)** = 295

41 **Number of references** = 21

42 **Number of figures** = 2

43 **Number of tables** = 3  
44  
45  
46  
47  
48  
49  
50  
51  
52  
53  
54  
55  
56  
57  
58  
59  
60

**ARTICLE SUMMARY –****'Article focus':**

- Optimal nutritional care is critical for neonatal intensive care unit patients and associated with improved outcomes in later life.
- Clinical practice guidelines for parenteral nutrition exist, however, current clinical practice in Europe and compliance with these recommendations is unknown.
- The main objective was to assess the adherence to guidelines for parenteral nutrition in preterm infants in Four European Countries.

**'Key messages'**

- The initiation of PN is still frequently not compliant with current recommendations, with the main differences observed during the first days of life.
- There is an urgent need to improve dissemination of guidelines and to facilitate translation of knowledge into clinical practice.
- Web-based standard reporting systems that determine the actual compliance of in-house protocols with guidelines should be developed in parallel to determine to what extent new guidelines are translated into clinical practice.

**'Strengths and limitations of this study' section.****Strengths:**

- Nutrition for preterm infants is a hot topic in the field of neonatology.
- Large survey in 4 European countries that included 74% of the units of the 4 countries
- Surveys reflect one of the first steps of the dissemination of guidelines and, thus, provides insight on compliance to guidelines

**Limitations**

- Surveys reflect the intention to treat of the personnel from the NICU that respond to the survey, and may not reflect the actual clinical practice within the unit

**ABSTRACT**

**Objective:** Level of adherence to guidelines is often not known and should be explored particularly in preterm infants for which poor nutrition has major effects on outcomes in later life. The main objective was to evaluate compliance to international guidelines for parenteral nutrition (PN) in preterm infants across Neonatal intensive care units (NICUs) of four European countries.

**Design:** Clinical practice survey by the mean of a questionnaire addressing routine PN protocols, awareness and implementation of guidelines.

**Setting:** NICUs in the United Kingdom, Italy, Germany and France.

**Participants:** One senior physician per unit; 199 units which represent 74% of the NICUs of the 4 countries.

**Primary outcome measure:** Adherence of unit protocol to international guidelines; **Secondary outcome measure:** Factors that influence adherence to guidelines.

**Results:** Eighty percent of the respondents stated that they were aware of some PN clinical practice guidelines. For amino acid infusion (AA), 63% of the respondents initiate AA on D0, 38% administer an initial dose of  $\geq 1.5$  g/kg/d to prevent a negative balance and 91% aim for a target dose for AA of 3 or 4 g/kg/d, as recommended. For lipid administration, 90% of the respondents initiate parenteral lipids during the first 3 days of life, 39% use an initial dose  $\geq 1.0$  g/kg/d, and 76% define the target dose for lipids as 3 to 4 g/kg/d, as recommended. Significant variations in PN protocols were observed among countries but the type of hospital or the number of admissions per year had only a marginal impact on the PN protocols.

**Conclusions:** Clinicians initiate PN earlier than in the past but the initiation of PN is still frequently not compliant with international guidelines. Continuous education focusing on parenteral nutrition practice is needed, and greater efforts are required to disseminate and implement international guidelines.

**Abbreviations:**

AA – amino acids; D0 – the first day of life; ELBW – extremely low birth weight;

EN – enteral nutrition; NICU – neonatal intensive care unit; PN – parenteral nutrition;

UK – United Kingdom; US – United States of America; VLBW – very low birth weight

For peer review only

## INTRODUCTION

Poor nutrition in preterm infants has major effects on outcomes in later life, including physical growth, intellectual development and, possibly, cardiovascular and metabolic effects.[1, 2] The quality and quantity of daily nutritional intake is critical particularly during the first weeks of life since amino acid, energy and lipid intake from parenteral nutrition have been shown to be associated with later development.[3, 4] Reports from neonatal intensive care units (NICUs) worldwide have shown that nutritional intake in preterm infants is inadequate.[5, 6] The causes of this inadequate intake, particularly in the early neonatal phase, may be multifactorial and partly iatrogenic. It may depend not only on the infant's metabolic capacities, but also on the availability and safety of the solutions used, the type of venous access, the department's usual practice, and the prescriber's knowledge of the infant's nutritional needs.[7]

Clinical practice guidelines for the nutritional needs of preterm infants have been regularly revised over recent decades, leading to the development of the most recent international guidelines on paediatric parenteral nutrition (PN) in Europe from the European Society of Paediatric Gastroenterology, Hepatology and Nutrition (ESPGHAN) and the European Society for Clinical Nutrition and Metabolism (ESPEN) in 2005 [8] and globally in the book entitled "Nutritional needs of the preterm infant: Scientific basis and practical guidelines" also published in 2005.[9] (Table 1) Previous studies, especially those performed before current clinical practice guidelines were available, demonstrated large differences in both the nutritional protocols applied in clinical practice and the resulting clinical outcomes.[6, 10, 11] A recent systematic review showed that large differences are observed in the nutritional protocols both among the NICUs in the individual surveys and among surveys.[12]

Level of adherence to guidelines is often not known and it remains unclear to what extent recommendations for early parenteral nutrition in NICU patients have been translated into routine clinical care in Europe. Therefore, we performed a clinical practice survey among NICU physicians in

1  
2  
3 four European countries to evaluate compliance to international guidelines for parenteral nutrition  
4  
5 (PN) in preterm infants and to determine factors that influence compliance to guidelines.  
6  
7  
8

## 9 **METHODS**

10  
11 The survey questionnaire was developed under the lead of AL together with the coauthors. The  
12  
13 survey was implemented in a web-based format by an independent company (GfK SE Division  
14  
15 HealthCare, Nürnberg, Germany). It was conducted in a blinded manner between October 2009 and  
16  
17 April 2010 among NICU physicians in Germany, the United Kingdom (UK), France and Italy in order to  
18  
19 survey ~50 units per country. One author from each country provided a list of the largest NICUs  
20  
21 using available data and their own knowledge of national and regional units, with at least one senior  
22  
23 physician's name per unit. NICUs were selected for the study if they had high acuity or intensive care  
24  
25 beds and >5 infants per week requiring parenteral nutrition. The senior physician from each NICU  
26  
27 was contacted and asked to complete the survey questionnaire or delegate the task to a colleague  
28  
29 devoting  $\geq 20\%$  of their time to patient care and with >3 years of clinical experience in neonatal  
30  
31 intensive care. Where a response was not obtained other physicians from the same unit were  
32  
33 approached, if available. The identity of the physicians contacted and requested to complete the  
34  
35 survey remained blinded for the analysis and to all authors.  
36  
37  
38

39  
40 The survey questionnaire was developed in English and translated into German, French and Italian  
41  
42 for use in the national language of each country. For the purpose of the survey, PN was defined as  
43  
44 intravenous nutrition given via a central or peripheral line and containing fluids and any macro- or  
45  
46 micronutrients. Respondents were instructed to consider only in-hospital neonatal intensive care  
47  
48 patients. D0 was defined as the first day of life, D1 for the subsequent 24 h, and D2 and D3 the  
49  
50 following days. The survey comprised sections to characterize the profile of the NICU, and routine  
51  
52 clinical practice with respect to PN between D0 and D3. The survey assessed the logistical  
53  
54 organization of PN within the hospital, the types of PN available and prescribed, and some of the  
55  
56  
57  
58  
59  
60

1  
2  
3 reasons for use or non-use of standard formulations, preferred product characteristics and  
4 awareness and implementation of local and international clinical practice guidelines. Only the unit  
5 profile, clinical practice parameters and awareness and implementation of guidelines were analyzed  
6 for this report.  
7  
8  
9

10 Statistical analyses were restricted to completed questionnaires with evaluable results. Data were  
11 split to cross tabs with respect to various grouping variables. First class split variables consisted of  
12 tertiles or quartiles, which were computed on the average number of admissions to the neonatal  
13 intensive care unit per year by birth weight up to 1500 g. The second class of grouping factors  
14 comprised categorical variables such as hospital type or country. The goal was to examine the null  
15 hypothesis "No pairwise differences in proportions across subgroups". Null hypotheses were tested  
16 using  $\chi^2$ -tests and rejected at the 5% error level.  
17  
18  
19  
20  
21  
22  
23  
24  
25  
26  
27  
28

## 29 **RESULTS**

### 30 **Profile of the NICUs surveyed**

31 A total of 199 NICUs were surveyed (45 from the UK, 55 from Germany, 49 from France and 50 from  
32 Italy) and their characteristics are presented in table 2. Overall, we surveyed 74% of the units of the  
33 4 countries: 45/64 (70%) in the UK; 55/78 (71%) in Germany; 49/66 (74%) in France; 50/60 (83%) in  
34 Italy). One hundred sixty one of the 199 (81%) surveys were included in the analysis as 38 surveys  
35 were excluded due to invalid responses. The majority of invalid surveys came from units with less  
36 than 4 beds of high acuity care.  
37  
38  
39  
40  
41  
42  
43  
44  
45

### 46 **Awareness of nutritional guidelines**

47 Eighty percent of physicians across all countries reported an awareness of nutritional guidelines, but  
48 less than 50% gave a source or specification (Table 3). There were inter-country differences for  
49 physicians reporting an awareness of clinical practice guidelines for neonatal or pediatric PN (Table  
50 2). Respondents indicated that they agreed with most of the recommendations, with 66% and 70%  
51 of physicians from Germany and France and 46% and 53% in UK and Italy in strong agreement  
52  
53  
54  
55  
56  
57  
58  
59  
60



1  
2  
3 (Figure 1). Overall, the physicians agreed less strongly with the statement “I obtain a copy, read and  
4 follow guidelines for parenteral nutrition in pediatric patients as soon as they become available”  
5 (Figure 1). When asked whether the lack of robust evidence on which the guidelines are based  
6 presented a barrier to implementation, 3% and 7% of the physicians from France and Italy agreed, in  
7 comparison to 9% and 12% of the respondents from Germany and the UK (Figure 2). About 60-70%  
8 of the physicians did not find current guidelines too complex and those from both the UK and Italy  
9 more often found the guidelines to be too theoretical to be used in clinical practice than  
10 respondents from Germany or France. Respondents from Germany were most likely to report relying  
11 on internal clinical practice protocols (Figure 2).  
12  
13  
14  
15  
16  
17  
18  
19  
20  
21

### 22 **Adherence of unit protocol to international guidelines**

23  
24 Survey respondents were requested to provide information on the timing and composition of PN as  
25 summarized in table 4. With regards to initiation of PN, amino acids are initiated by 63% of the  
26 responding units on the first day of life (D0) and by 32% on D1. Amino acids were reported to be  
27 started at a dose of 1.0 g/kg/d or less by 60% overall. Glucose was administered at a starting dose of  
28 6 or 7 g/kg/d by 71% of the NICUs surveyed. Lipid emulsions were initiated by 20% of the units on D0  
29 and by an additional 48% on D1. Initial lipid dose was reported to be 0.5 or 1.0 g/kg/d by 98% of  
30 respondents. With regards to full parenteral nutrition, most NICUs (91%) reported a target dose for  
31 amino acids of 3 or 4 g/kg/d. Overall, 66% of the units administered a target dose of glucose of 15 or  
32 16 g/kg/d, and 76% of the units administered a target dose of lipids of 3 or 4 g/kg/d.  
33  
34  
35  
36  
37  
38  
39  
40  
41  
42  
43

### 44 **Factors that influence adherence to guidelines**

45  
46 There was a significant effect of countries on parenteral nutrition practices (Table 4).  
47

48 When the PN results were stratified by hospital type, no differences were observed in the initiation,  
49 starting or target dose of amino acids (Data not shown). University or teaching hospitals reported  
50 higher starting doses of glucose than other types of hospital (40% vs. 56% at 6 g/kg/d and 32% vs.  
51 13% at 7 g/kg/d;  $p=0.022$ ), but there was no significant difference in the target dose between the  
52 two types of institution. University or teaching hospitals also report initiation of lipid feeding earlier  
53  
54  
55  
56  
57  
58  
59  
60

1  
2  
3 than other institutions (initiation on D3 or later 5% vs. 20%;  $p=0.015$ ), but with no significant  
4  
5 difference in starting or target dose. The caloric targets between the two types of hospital were  
6  
7 similar, but the normal maximal caloric intake prescribed were significantly different ( $p=0.008$ ).  
8

9  
10 When the data were stratified by the number of admissions, the only category in which a significant  
11  
12 difference was apparent was the day on which lipid feeding was initiated. Units with lower  
13  
14 admissions rates were more likely to report initiation on D3 or later ( $p=0.011$ ) (Data not shown).  
15

## 16 17 18 **DISCUSSION**

19  
20 This study represents the first survey of neonatal PN clinical practice behavior undertaken at the  
21  
22 European level. This type of survey emphasizes how current practices differ from recommended  
23  
24 guidelines and encourage clinicians to be aware of the potential for improvement. Since the  
25  
26 objective of the study was to compare the data with international guidelines (table 4) we did not  
27  
28 report and/or use local guidelines, if any, and for consistency, we mainly used for comparison the  
29  
30 European guidelines which are widely available.[8]  
31

32  
33 Despite demonstrating apparent improvement in PN practices, the results presented here shows  
34  
35 that 37% of neonatal units in Europe initiate amino acid feeding on D1 or later and not on D0 as  
36  
37 recommended.[8] Moreover, 60% of the European respondents administer an initial dose of less  
38  
39 than the required 1.5 g/kg/d to prevent a negative balance.[8] The apparent higher compliance with  
40  
41 guideline recommendations to initiate amino acid infusion on D0 and a target dose of 3-4 g/kg/d in  
42  
43 France may be attributable to a combination of commercially available binary standard solutions  
44  
45 and/or awareness of a national survey on this topic and widely disseminated at the country  
46  
47 level.[13]  
48

49  
50 Our study shows that whilst 90% of the NICUs surveyed provide early lipids, 21% of them provide a  
51  
52 maximum dose lower than recommended. This is similar to other surveys suggesting that physicians  
53  
54 do not comply easily with the guideline defining the optimal dose for parenteral lipids. Previous  
55  
56 surveys have shown that the timing and dose of parenteral lipids vary between surveys to a scale  
57  
58  
59  
60

1  
2  
3 which is larger than that for amino acids.[12] It was also found that there was a lack of consensus  
4  
5 between surveys on the contraindications for lipids and/or indication for stopping lipids. This may  
6  
7 reflect the lack of scientific data and absence of clear guidance on this topic.  
8

9  
10 Awareness of some guidelines was reported by the majority of physicians completing the survey,  
11  
12 although 21% claimed not to be aware of any guidelines. This may be of relevance when the 40% of  
13  
14 respondents who do not provide amino acids on the first day of life are considered, highlighting a  
15  
16 potential deficit in implementation of the guidelines. Limited access to standard solutions and  
17  
18 specific country regulations on preparation may also be possible alternative explanations why  
19  
20 guidelines have not been translated into clinical practice.  
21

22  
23 University/teaching hospitals provided a higher starting dose of glucose and initiated lipid and amino  
24  
25 acid infusion earlier compared to other institutions. Similarly, late initiation of lipid infusion (D3 or  
26  
27 later) was less common in NICUs with a highest number of admissions per year. While these results  
28  
29 may suggest better adherence to treatment guidelines at hospitals with a high number of  
30  
31 admissions, the existing data are unclear as to whether high numbers of admissions are also  
32  
33 associated with lower rates of mortality or morbidity.[14, 15]  
34

35  
36 The methodological limitations of using surveys for the assessment of nutritional protocols have  
37  
38 been previously discussed in detail [13] and it should be reiterated that these surveys reflect the  
39  
40 intention to treat of the personnel from the NICU that respond to the survey, and may not reflect  
41  
42 the actual clinical practice within the unit. Nevertheless, intention to treat reflects one of the first  
43  
44 steps of the dissemination of guidelines and, thus, provides insight on compliance to guidelines. The  
45  
46 number of countries participating in our survey was limited to 4 for practical reasons and, therefore,  
47  
48 the results obtained do not permit conclusions that apply to other European countries. The number  
49  
50 of surveys received represents a substantial proportion of NICUs in each of the 4 countries; however,  
51  
52 the number of invalid surveys indicates that there may have been some confusion with respect to  
53  
54 terminology or intent. Interestingly, the invalid responses were mainly seen in smaller units which  
55  
56  
57  
58  
59  
60

1  
2  
3 are less likely to prescribe PN. This is in line with the observation that larger units prescribe PN that  
4  
5 are more likely compliant with guidelines.  
6

7  
8 Finally, our results allow comparison of current practices among countries but also historical  
9  
10 comparison with similar surveys published earlier.[12] When compared to studies performed in the  
11  
12 United States [16] or individual European countries [17-20], our study shows that PN in preterm  
13  
14 neonates is provided earlier and in higher volumes than in the past, reflecting changing clinical  
15  
16 practice in response to increased knowledge about parenteral feeding in neonates, even if the  
17  
18 practices are still not perfectly in line with guidelines.  
19

20  
21 In conclusion, most respondents indicated that their clinical practice was based on common  
22  
23 guidelines. They are initiating parenteral nutrition earlier and in larger volumes than in the past,  
24  
25 reflecting increased knowledge about best nutritional practices in very preterm neonates. However,  
26  
27 the initiation of PN is still frequently not compliant with current recommendations, with the main  
28  
29 differences observed during the first days of life. Our study shows that there is an urgent need to  
30  
31 improve dissemination of guidelines and to facilitate translation of knowledge into clinical practice.  
32

33  
34 Given the need for continuous monitoring, it would be of value for scientific societies (particularly  
35  
36 those that publish guidelines) to develop web-based standard reporting systems that determine the  
37  
38 actual compliance of in-house protocols with guidelines. In the case of the nutrition for preterm  
39  
40 infants, a limited number of questions on access to PN and the dose of nutrients given would be  
41  
42 sufficient to provide insight on the implementation of guidelines at a local level.  
43  
44  
45  
46  
47  
48  
49  
50  
51  
52  
53  
54  
55  
56  
57  
58  
59  
60

**ACKNOWLEDGEMENTS**

The authors thank Istvan Szabo, Ines Pereira da Silva Lopes and Michael Imeokparia from Baxter Healthcare (Glattpark, Switzerland) for their insightful contribution to the project. Editorial assistance was provided by Physicians World Europe GmbH (Mannheim, Germany), sponsored by Baxter Healthcare. The authors thank the Association pour la Recherche et la Formation En Neonatologie (ARFEN) for providing technical assistance. Special thanks go to all the physicians who have completed the questionnaire for their contribution.

**FUNDING SOURCE**

This study was sponsored by Baxter Healthcare (Glattpark, Switzerland) who provided support for the development and implementation of the survey, face-to-face meetings, and writing of manuscript. All authors have received an unrestricted institutional grant from Baxter Healthcare for coordinating the study in their own country.

**CONFLICT OF INTEREST STATEMENT:**

The authors have no conflicts of interest relevant to this article to disclose.

## REFERENCES

1. Isaacs EB, Gadian DG, Sabatini S, Chong WK, Quinn BT, Fischl BR, Lucas A: The effect of early human diet on caudate volumes and IQ. *Pediatr Res* 2008, **63**(3):308-314.
2. Lapillonne A, Griffin IJ: Feeding preterm infants today for later metabolic and cardiovascular outcomes. *The Journal of pediatrics* 2013, **162**(3 Suppl):S7-16.
3. dit Trolli SE, Kermorvant-Duchemin E, Huon C, Bremond-Gignac D, Lapillonne A: Early lipid supply and neurological development at one year in very low birth weight (VLBW) preterm infants. *Early Hum Dev* 2012, **88** Suppl 1:S25-29.
4. Stephens BE, Walden RV, Gargus RA, Tucker R, McKinley L, Mance M, Nye J, Vohr BR: First-week protein and energy intakes are associated with 18-month developmental outcomes in extremely low birth weight infants. *Pediatrics* 2009, **123**(5):1337-1343.
5. Martin CR, Brown YF, Ehrenkranz RA, O'Shea TM, Allred EN, Belfort MB, McCormick MC, Leviton A: Nutritional practices and growth velocity in the first month of life in extremely premature infants. *Pediatrics* 2009, **124**(2):649-657.
6. Olsen IE, Richardson DK, Schmid CH, Ausman LM, Dwyer JT: Intersite differences in weight growth velocity of extremely premature infants. *Pediatrics* 2002, **110**(6):1125-1132.
7. Corpeleijn WE, Vermeulen MJ, van den Akker CH, van Goudoever JB: Feeding very-low-birth-weight infants: our aspirations versus the reality in practice. *Ann Nutr Metab* 2011, **58** Suppl 1:20-29.
8. Koletzko B, Goulet O, Hunt J, Krohn K, Shamir R: 1. Guidelines on Paediatric Parenteral Nutrition of the European Society of Paediatric Gastroenterology, Hepatology and Nutrition (ESPGHAN) and the European Society for Clinical Nutrition and Metabolism (ESPEN), Supported by the European Society of Paediatric Research (ESPR). *J Pediatr Gastroenterol Nutr* 2005, **41** Suppl 2:S1-87.
9. Tsang R, Uauy R, Koletzko B, Zlotkin SH: *Nutritional Needs of the Preterm Infant: Scientific Basis and Practical Guidelines*. Cincinnati, OH; 2005.

10. Blackwell MT, Eichenwald EC, McAlmon K, Petit K, Linton PT, McCormick MC, Richardson DK: Interneonatal intensive care unit variation in growth rates and feeding practices in healthy moderately premature infants. *J Perinatol* 2005, **25**(7):478-485.
11. Clark RH, Thomas P, Peabody J: Extrauterine growth restriction remains a serious problem in prematurely born neonates. *Pediatrics* 2003, **111**(5 Pt 1):986-990.
12. Lapillonne A, Kermorvant-Duchemin E: Parenteral Nutrition for NICU Patients – A Systematic Review of Current Practice Surveys *J Nutr* in press.
13. Lapillonne A, Fellous L, Mokthari M, Kermorvant-Duchemin E: Parenteral nutrition objectives for very low birth weight infants: results of a national survey. *J Pediatr Gastroenterol Nutr* 2009, **48**(5):618-626.
14. Phibbs CS, Baker LC, Caughey AB, Danielsen B, Schmitt SK, Phibbs RH: Level and volume of neonatal intensive care and mortality in very-low-birth-weight infants. *N Engl J Med* 2007, **356**(21):2165-2175.
15. Horbar JD, Badger GJ, Lewit EM, Rogowski J, Shiono PH: Hospital and patient characteristics associated with variation in 28-day mortality rates for very low birth weight infants. Vermont Oxford Network. *Pediatrics* 1997, **99**(2):149-156.
16. Hans DM, Pylipow M, Long JD, Thureen PJ, Georgieff MK: Nutritional practices in the neonatal intensive care unit: analysis of a 2006 neonatal nutrition survey. *Pediatrics* 2009, **123**(1):51-57.
17. Grover A, Khashu M, Mukherjee A, Kairamkonda V: Iatrogenic malnutrition in neonatal intensive care units: urgent need to modify practice. *JPEN J Parenter Enteral Nutr* 2008, **32**(2):140-144.
18. Lapillonne A, Fellous L, Kermorvant-Duchemin E: Use of parenteral lipid emulsions in French neonatal ICUs. *Nutr Clin Pract* 2011, **26**(6):672-680.
19. Ahmed M, Irwin S, Tuthill DP: Education and evidence are needed to improve neonatal parenteral nutrition practice. *JPEN J Parenter Enteral Nutr* 2004, **28**(3):176-179.

1  
2  
3 20. Fleming P, Chong A, Woolhead E, Mc Dermott C, Clarke T: A national survey of current  
4  
5 practice in the management of very low and extremely low birth weight infants: is there a role for  
6  
7 national guidelines? Irish medical journal 2008, **101**(10):310-313.  
8

9  
10 21. Powers RW, Catov JM, Bodnar LM, Gallaher MJ, Lain KY, Roberts JM: Evidence of endothelial  
11  
12 dysfunction in preeclampsia and risk of adverse pregnancy outcome. Reprod Sci 2008, **15**(4):374-  
13  
14 381.  
15

16  
17  
18  
19  
20  
21  
22  
23  
24  
25  
26  
27  
28  
29  
30  
31  
32  
33  
34  
35  
36  
37  
38  
39  
40  
41  
42  
43  
44  
45  
46  
47  
48  
49  
50  
51  
52  
53  
54  
55  
56  
57  
58  
59  
60

For peer review only



1  
2  
3 **Figure legends**  
4  
5  
6

7 **Figure 1.** Use of international clinical practice recommendations to guide neonatal parenteral  
8 nutrition by country.  
9  
10

11  
12  
13 **Figure 2.** Justification for non-implementation of international clinical practice guidelines by country.  
14  
15  
16  
17  
18  
19  
20  
21  
22  
23  
24  
25  
26  
27  
28  
29  
30  
31  
32  
33  
34  
35  
36  
37  
38  
39  
40  
41  
42  
43  
44  
45  
46  
47  
48  
49  
50  
51  
52  
53  
54  
55  
56  
57  
58  
59  
60

For peer review only

**Tables****Table 1.** International recommendations for parenteral nutrition in preterm infants.

|                        | Tsang et al., 2005[9]                                           | ESPEN/ESPGHAN/ESPR guidelines, 2005[8] |
|------------------------|-----------------------------------------------------------------|----------------------------------------|
| <b>Amino acids</b>     |                                                                 |                                        |
| initiation             | 1 <sup>st</sup> day of life                                     | 1 <sup>st</sup> day of life            |
| initial dose, g/kg/d   | 2                                                               | ≥1.5                                   |
| target dose, g/kg/d    | 3.5-4 (ELBW)<br>3.2-3.8 (VLBW)                                  | maximum 4                              |
| <b>Glucose</b>         |                                                                 |                                        |
| initiation             | 1 <sup>st</sup> day of life                                     | 1 <sup>st</sup> day of life            |
| initial dose, g/kg/d   | 7                                                               | 5.8-11.5                               |
| target dose, g/kg/d    | 13-17 (ELBW)<br>9.7-15 (VLBW)                                   | --                                     |
| <b>Lipids</b>          |                                                                 |                                        |
| initiation             | 1 <sup>st</sup> day of life (VLBW)<br>Cautious support for ELBW | No later than 3 <sup>rd</sup> day      |
| initial dose, g/kg/d   | ≥1                                                              | Linoleic acid >0.25                    |
| target dose, g/kg/d    | 3-4                                                             | 3-4                                    |
| <b>Energy</b>          |                                                                 |                                        |
| caloric target, g/kg/d | 105-115 (ELBW)<br>90-100 (VLBW)                                 | 110-120                                |

VLBW: very low birth weight infants; ELBW: extremely low birth weight infants; --, no recommendation provided  
 ESPEN/ESPGHAN/ESPR, European Society for Clinical Nutrition and Metabolism, European Society of Paediatric Gastroenterology, Hepatology and Nutrition, European Society of Paediatric Research

**Table 2.** Characteristics of participating NICUs.

| Characteristic                         | TOTAL               | Germany          | UK                 | France             | Italy            |
|----------------------------------------|---------------------|------------------|--------------------|--------------------|------------------|
| Questionnaires received, n             | 199                 | 55               | 45                 | 49                 | 50               |
| Questionnaires analyzed, n             | 161                 | 54               | 39                 | 49                 | 19               |
| Type of hospital, n (%)                |                     |                  |                    |                    |                  |
| University/teaching hospital           | 106 (66)            | 44 (82)          | 27 (69)            | 31 (63)            | 4 (21)           |
| Non-university                         | 55 (34)             | 10 (19)          | 12 (31)            | 18 (37)            | 15 (79)          |
| Bed capacity per unit, n (%)           |                     |                  |                    |                    |                  |
| 1-5                                    | 19 (12)             | 2 (4)            | 8 (21)             | 3 (6)              | 6 (32)           |
| 6-10                                   | 73 (45)             | 22 (41)          | 21 (54)            | 23 (47)            | 7 (37)           |
| 11-15                                  | 45 (28)             | 18 (33)          | 5 (13)             | 19 (39)            | 3 (16)           |
| ≥16                                    | 24 (15)             | 12 (22)          | 5 (13)             | 4 (8)              | 3 (16)           |
| Intermediate care beds per unit, n (%) |                     |                  |                    |                    |                  |
| 1-5                                    | 30 (19)             | 13 (24)          | 5 (13)             | 4 (8)              | 8 (42)           |
| 6-10                                   | 56 (35)             | 16 (30)          | 15 (39)            | 17 (35)            | 8 (42)           |
| 11-15                                  | 33 (21)             | 9 (17)           | 6 (15)             | 15 (31)            | 3 (16)           |
| ≥16                                    | 38 (24)             | 14 (26)          | 13 (33)            | 11 (22)            | 6 (12)           |
| NR                                     | 4 (3)               | 2 (4)            | 0 (0)              | 2 (4)              | 0 (0)            |
| VLBW infants per year, median (IQR)    | 90.0 (129.00-60.00) | 64 (86.25-40.00) | 105 (160.00-80.00) | 125 (195.00-98.00) | 75 (90.00-55.00) |

NR, no response

IQR, interquartile range

(Percentages do not necessarily sum up to 100% due to rounding)

**Table 3.** Guideline awareness by country.

| <b>Question</b>                                                                                                          | <b>TOTAL</b> | <b>Germany</b> | <b>UK</b> | <b>France</b> | <b>Italy</b> |
|--------------------------------------------------------------------------------------------------------------------------|--------------|----------------|-----------|---------------|--------------|
|                                                                                                                          | n (%)        | n (%)          | n (%)     | n (%)         | n (%)        |
| <b>Are you aware of guidelines for use of neonatal / pediatric parenteral nutrition? (asymptotic significance 0.073)</b> |              |                |           |               |              |
| Yes                                                                                                                      | 128 (80)     | 47 (87)        | 33 (85)   | 33 (67)       | 15 (79)      |
| No                                                                                                                       | 33 (21)      | 7 (13)         | 6 (15)    | 16 (33)       | 4 (21)       |
| <b>Of which guidelines are you aware?*</b>                                                                               |              |                |           |               |              |
| International[8, 21]                                                                                                     | 33 (26)      | 10 (21)        | 9 (27)    | 10 (30)       | 4 (27)       |
| National                                                                                                                 | 24 (19)      | 16 (34)        | 2 (6)     | 0 (0)         | 6 (40)       |
| In-house guidelines                                                                                                      | 8 (6)        | 4 (9)          | 2 (6)     | 0 (0)         | 2 (13)       |
| None specifically named/other                                                                                            | 66 (52)      | 19 (40)        | 17 (52)   | 24 (73)       | 6 (40)       |

\*More than one answer per questionnaire possible.  
 (Percentages do not necessarily sum up to 100% due to rounding)

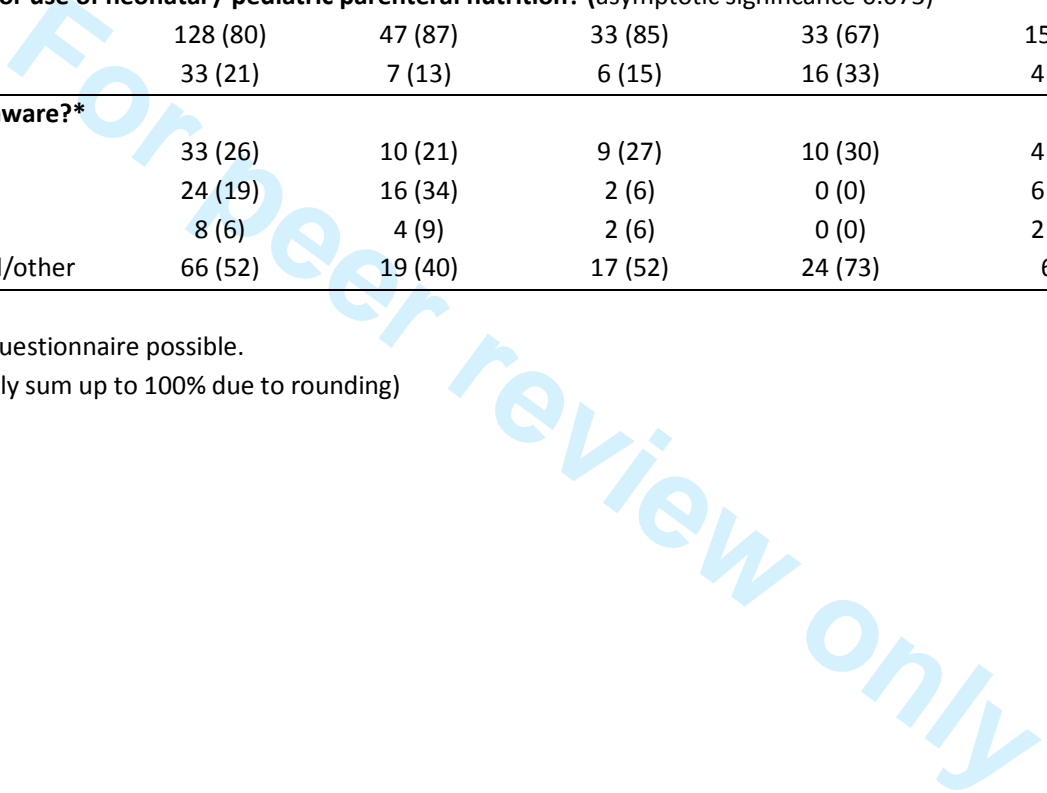

**Table 4.** Current practice for parenteral nutrition in NICU patients.

| Nutrient                         | TOTAL<br>n (%) | Germany<br>n (%) | UK<br>n (%) | France<br>n (%) | Italy<br>n (%) |
|----------------------------------|----------------|------------------|-------------|-----------------|----------------|
| Amino acids                      |                |                  |             |                 |                |
| Initiation (p=0.005)             |                |                  |             |                 |                |
| D0                               | 101 (63)       | 32 (59)          | 21 (54)     | 41 (84)         | 7 (37)         |
| D1                               | 51 (32)        | 19 (35)          | 15 (39)     | 8 (16)          | 9 (47)         |
| D2 or later                      | 9 (6)          | 3 (6)            | 3 (8)       | 0 (0)           | 3 (16)         |
| Initial dose (p=0.001)           |                |                  |             |                 |                |
| 0.5 g/kg/d                       | 44 (27)        | 20 (37)          | 11 (28)     | 5 (10)          | 8 (42)         |
| 1.0 g/kg/d                       | 53 (33)        | 14 (26)          | 9 (23)      | 24 (49)         | 6 (32)         |
| 1.5 g/kg/d                       | 34 (21)        | 5 (9)            | 11 (28)     | 15 (31)         | 3 (16)         |
| 2 g/kg/d or higher               | 27 (17)        | 15 (28)          | 5 (13)      | 5 (10)          | 2 (11)         |
| Do not know                      | 3 (2)          | 0 (0)            | 3 (8)       | 0 (0)           | 0 (0)          |
| Target dose (p<0.001)            |                |                  |             |                 |                |
| 1 or 2 g/kg/d                    | 11 (7)         | 6 (11)           | 3 (8)       | 0 (0)           | 2 (11)         |
| 3 or 4 g/kg/d                    | 146 (91)       | 48 (89)          | 34 (87)     | 49 (100.0)      | 15 (79)        |
| 5 g/kg/d or higher / Do not know | 4 (3)          | 0 (0)            | 2 (5)       | 0 (0)           | 2 (11)         |
| Glucose                          |                |                  |             |                 |                |
| Initial dose (p<0.001)           |                |                  |             |                 |                |
| 6 g/kg/d                         | 73 (45)        | 27 (50)          | 12 (31)     | 19 (39)         | 15 (79)        |
| 7 g/kg/d                         | 41 (26)        | 18 (33)          | 3 (8)       | 18 (37)         | 2 (11)         |
| 8 g/kg/d                         | 28 (17)        | 6 (11)           | 9 (23)      | 12 (25)         | 1 (5)          |
| 9 g/kg/d or higher               | 17 (11)        | 3 (6)            | 13 (33)     | 0 (0)           | 1 (5)          |
| Do not know                      | 2 (1)          | 0 (0)            | 2 (5)       | 0 (0)           | 0 (0)          |
| Target dose (p<0.001)            |                |                  |             |                 |                |
| 15 g/kg/d                        | 68 (42)        | 22 (41)          | 21 (54)     | 8 (16)          | 17 (90)        |

|                                                       |          |         |         |         |         |
|-------------------------------------------------------|----------|---------|---------|---------|---------|
| 16 g/kg/d                                             | 38 (24)  | 14 (26) | 5 (13)  | 18 (37) | 1 (5)   |
| 17 g/kg/d                                             | 12 (8)   | 5 (9)   | 2 (5)   | 5 (10)  | 0 (0)   |
| 18 g/kg/d or higher                                   | 32 (20)  | 10 (19) | 3 (8)   | 18 (37) | 1 (5)   |
| Do not know                                           | 11 (7)   | 3 (6)   | 8 (21)  | 0 (0)   | 0 (0)   |
| <b>Lipids</b>                                         |          |         |         |         |         |
| Initiation (p=0.160)                                  |          |         |         |         |         |
| D0                                                    | 32 (20)  | 12 (22) | 12 (31) | 3 (6)   | 5 (26)  |
| D1                                                    | 77 (48)  | 24 (44) | 17 (44) | 28 (57) | 8 (42)  |
| D2                                                    | 36 (22)  | 11 (20) | 9 (23)  | 11 (22) | 5 (26)  |
| D3 or later                                           | 16 (10)  | 7 (13)  | 1 (3)   | 7 (14)  | 1 (5)   |
| Do not know                                           | 0 (0)    | 0 (0)   | 0 (0)   | 0 (0)   | 0 (0)   |
| Initial dose (p<0.001)                                |          |         |         |         |         |
| 0.5 g/kg/d                                            | 98 (61)  | 34 (63) | 11 (28) | 36 (74) | 17 (90) |
| 1.0 g/kg/d                                            | 59 (37)  | 18 (33) | 27 (70) | 13 (27) | 1 (5)   |
| 1.5 g/kg/d or higher                                  | 3 (2)    | 2 (4)   | 0 (0)   | 0 (0)   | 1 (5)   |
| Do not know                                           | 1 (1)    | 0 (0)   | 1 (3)   | 0 (0)   | 0 (0)   |
| Target dose (p= 0.028)                                |          |         |         |         |         |
| 1 or 2 g/kg/d                                         | 34 (21)  | 15 (28) | 3 (8)   | 9 (18)  | 7 (37)  |
| 3 or 4 g/kg/d                                         | 123 (76) | 38 (70) | 33 (85) | 40 (82) | 12 (63) |
| 5 g/kg/d or higher / Do not know                      | 4 (3)    | 1 (2)   | 3 (8)   | 0 (0)   | 0 (0)   |
| <b>Caloric target (p&lt;0.001)</b>                    |          |         |         |         |         |
| 90 or 100 kcal/kg/d                                   | 29 (18)  | 3 (6)   | 15 (39) | 3 (6)   | 8 (42)  |
| 110 kcal/kg/d                                         | 28 (17)  | 8 (15)  | 6 (15)  | 11 (22) | 3 (16)  |
| 120 kcal/kg/d                                         | 65 (40)  | 25 (46) | 10 (26) | 26 (53) | 4 (21)  |
| 130 or more                                           | 35 (22)  | 18 (33) | 4 (10)  | 9 (18)  | 4 (21)  |
| Do not know                                           | 4 (3)    | 0 (0)   | 4 (10)  | 0 (0)   | 0 (0)   |
| <b>Maximal caloric intake prescribed (p&lt;0.001)</b> |          |         |         |         |         |
| 110 kcal/kg/d                                         | 13 (8)   | 1 (2)   | 7 (18)  | 3 (6)   | 2 (11)  |

|                       |         |         |         |         |        |
|-----------------------|---------|---------|---------|---------|--------|
| 120 kcal/kg/d         | 36 (22) | 9 (17)  | 12 (31) | 9 (18)  | 6 (32) |
| 130 kcal/kg/d         | 32 (20) | 10 (19) | 4 (10)  | 12 (25) | 6 (32) |
| 140 kcal/kg/d         | 37 (23) | 16 (30) | 2 (5)   | 18 (37) | 1 (5)  |
| 150 kcal/kg/d or more | 34 (21) | 18 (33) | 6 (15)  | 6 (12)  | 4 (21) |
| Do not know           | 9 (6)   | 0 (0)   | 8 (21)  | 1 (2)   | 0 (0)  |

D0, D1, D2; day 0, day 1, day 2

(Percentages do not necessarily sum up to 100% due to rounding)

1  
2  
3  
4  
5  
6  
7  
8  
9  
10  
11  
12  
13  
14  
15  
16  
17  
18  
19  
20  
21  
22  
23  
24  
25  
26  
27  
28  
29  
30  
31  
32  
33  
34  
35  
36  
37  
38  
39  
40  
41  
42  
43  
44  
45  
46  
47  
48  
49  
50  
51  
52  
53  
54  
55  
56  
57  
58  
59  
60

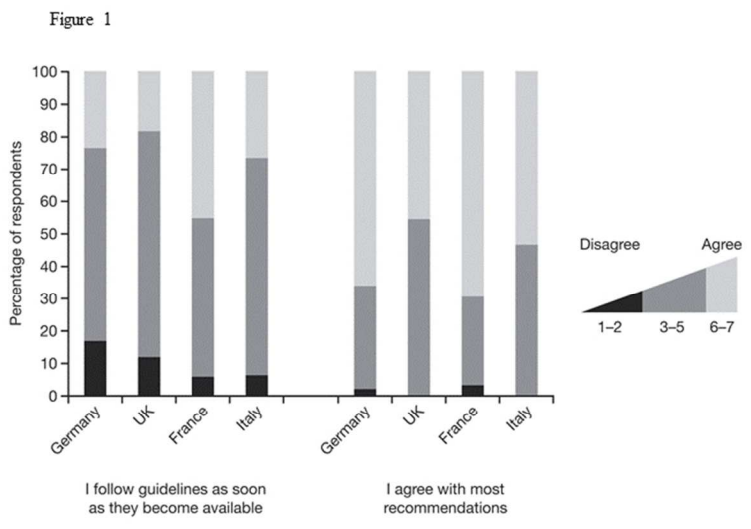

Use of international clinical practice recommendations to guide neonatal parenteral nutrition by country.  
254x366mm (72 x 72 DPI)



1  
2  
3  
4  
5  
6  
7  
8  
9  
10  
11  
12  
13  
14  
15  
16  
17  
18  
19  
20  
21  
22  
23  
24  
25  
26  
27  
28  
29  
30  
31  
32  
33  
34  
35  
36  
37  
38  
39  
40  
41  
42  
43  
44  
45  
46  
47  
48  
49  
50  
51  
52  
53  
54  
55  
56  
57  
58  
59  
60

Figure 2

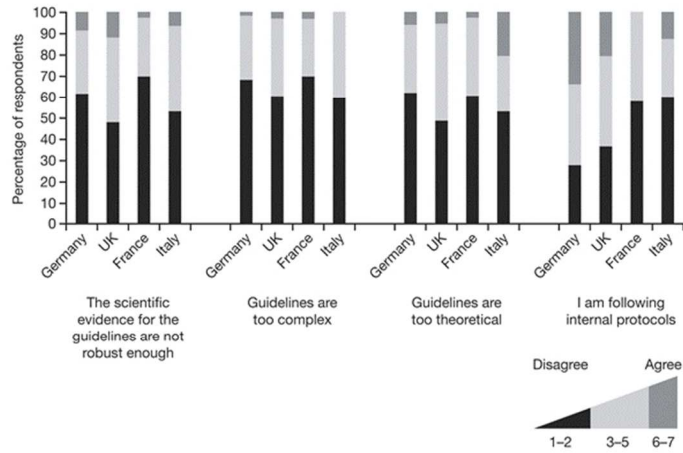

Justification for non-implementation of international clinical practice guidelines by country  
254x366mm (72 x 72 DPI)

**Table S1.** PN with amino acids, glucose and lipids by type of hospital.

| Nutrient               | TOTAL    | University/teaching hospital | Other hospital types |
|------------------------|----------|------------------------------|----------------------|
|                        | n (%)    | n (%)                        | n (%)                |
| Amino acids            |          |                              |                      |
| Initiation (p=0.069)   |          |                              |                      |
| D0                     | 101 (63) | 71 (67)                      | 30 (55)              |
| D1                     | 51 (32)  | 32 (30)                      | 19 (35)              |
| D2 or later            | 9 (6)    | 3 (3)                        | 6 (11)               |
| Initial dose (p=0.656) |          |                              |                      |
| 0.5 g/kg/d             | 44 (27)  | 28 (26)                      | 16 (29)              |
| 1.0 g/kg/d             | 53 (33)  | 34 (32)                      | 19 (35)              |
| 1.5 g/kg/d             | 34 (21)  | 23 (22)                      | 11 (20)              |
| 2 g/kg/d or higher     | 27 (17)  | 20 (19)                      | 7 (13)               |
| Do not know            | 3 (2)    | 1 (1)                        | 2 (4)                |
| Target dose (p=0.213)  |          |                              |                      |
| 1 or 2 g/kg/d          | 11 (7)   | 7 (7)                        | 4 (7)                |
| 3 or 4 g/kg/d          | 146 (91) | 98 (93)                      | 48 (87)              |

|                                  |         |         |         |
|----------------------------------|---------|---------|---------|
| 5 g/kg/d or higher / Do not know | 4 (3)   | 1 (1)   | 3 (6)   |
| <hr/>                            |         |         |         |
| Glucose                          |         |         |         |
| Initial dose (p=0.022)           |         |         |         |
| 6 g/kg/d                         | 73 (45) | 42 (40) | 31 (56) |
| 7 g/kg/d                         | 41 (26) | 34 (32) | 7 (13)  |
| 8 g/kg/d                         | 28 (17) | 19 (18) | 9 (16)  |
| 9 g/kg/d or higher               | 17 (11) | 11 (10) | 6 (11)  |
| Do not know                      | 2 (1)   | 0 (0)   | 2 (4)   |
| Target dose (p=0.160)            |         |         |         |
| 15 g/kg/d                        | 68 (42) | 40 (38) | 28 (51) |
| 16 g/kg/d                        | 38 (24) | 29 (27) | 9 (16)  |
| 17 g/kg/d                        | 12 (8)  | 8 (8)   | 4 (7)   |
| 18 g/kg/d or higher              | 32 (20) | 24 (23) | 8 (15)  |
| Do not know                      | 11 (7)  | 5 (5)   | 6 (11)  |
| <hr/>                            |         |         |         |
| Lipids                           |         |         |         |
| Initiation (p=0.015)             |         |         |         |
| D0                               | 32 (20) | 24 (23) | 8 (15)  |

1  
2  
3  
4  
5  
6  
7  
8  
9  
10  
11  
12  
13  
14  
15  
16  
17  
18  
19  
20  
21  
22  
23  
24  
25  
26  
27  
28  
29  
30  
31  
32  
33  
34  
35  
36  
37  
38  
39  
40  
41  
42  
43  
44  
45  
46  
47  
48  
49

|                                  |          |         |         |
|----------------------------------|----------|---------|---------|
| D1                               | 77 (48)  | 54 (51) | 23 (42) |
| D2                               | 36 (22)  | 23 (22) | 13 (24) |
| D3 or later                      | 16 (10)  | 5 (5)   | 11 (20) |
| Do not know                      | 0 (0)    | 0 (0)   | 0 (0)   |
| Initial dose (p=0.126)           |          |         |         |
| 0.5 g/kg/d                       | 98 (61)  | 60 (57) | 38 (69) |
| 1.0 g/kg/d                       | 59 (37)  | 43 (41) | 16 (29) |
| 1.5 g/kg/d or higher             | 3 (2)    | 3 (3)   | 0 (0)   |
| Do not know                      | 1 (1)    | 0 (0)   | 1 (2)   |
| Target dose (p= 0.372)           |          |         |         |
| 1 or 2 g/kg/d                    | 34 (21)  | 19 (18) | 15 (27) |
| 3 or 4 g/kg/d                    | 123 (76) | 84 (79) | 39 (71) |
| 5 g/kg/d or higher / Do not know | 4 (3)    | 3 (3)   | 1 (2)   |
| Caloric target (p=0.155)         |          |         |         |
| 90 or 100 kcal/kg/d              | 29 (18)  | 14 (13) | 15 (27) |
| 110 kcal/kg/d                    | 28 (17)  | 20 (19) | 8 (15)  |
| 120 kcal/kg/d                    | 65 (40)  | 44 (42) | 21 (38) |

|                                             |         |         |         |
|---------------------------------------------|---------|---------|---------|
| 130 or more                                 | 35 (22) | 24 (23) | 11 (20) |
| Do not know                                 | 4 (3)   | 4 (4)   | 0 (0)   |
| Maximal caloric intake prescribed (p=0.008) |         |         |         |
| 110 kcal/kg/d                               | 13 (8)  | 11 (10) | 2 (4)   |
| 120 kcal/kg/d                               | 36 (22) | 22 (21) | 14 (26) |
| 130 kcal/kg/d                               | 32 (20) | 14 (13) | 18 (33) |
| 140 kcal/kg/d                               | 37 (23) | 28 (26) | 9 (16)  |
| 150 kcal/kg/d or more                       | 34 (21) | 22 (21) | 12 (22) |
| Do not know                                 | 9 (6)   | 9 (9)   | 0 (0)   |

(Percentages do not necessarily sum up to 100% due to rounding)

**Table S2.** PN with amino acids, glucose and lipids by number of admissions.

| Nutrient               | TOTAL    | Number of admissions |          |         |
|------------------------|----------|----------------------|----------|---------|
|                        |          | 0 - 65               | 66 - 111 | ≥ 112   |
|                        |          | n (%)                | n (%)    | n (%)   |
| Amino acids            |          |                      |          |         |
| Initiation (p=0.262)   |          |                      |          |         |
| D0                     | 101 (63) | 24 (52)              | 43 (69)  | 34 (64) |
| D1                     | 51 (32)  | 17 (37)              | 17 (27)  | 17 (32) |
| D2 or later            | 9 (6)    | 5 (11)               | 2 (3)    | 2 (4)   |
| Initial dose (p=0.611) |          |                      |          |         |
| 0.5 g/kg/d             | 44 (27)  | 17 (37)              | 15 (24)  | 12 (23) |
| 1.0 g/kg/d             | 53 (33)  | 16 (35)              | 19 (31)  | 18 (34) |
| 1.5 g/kg/d             | 34 (21)  | 8 (17)               | 14 (23)  | 12 (23) |
| 2 g/kg/d or higher     | 27 (17)  | 5 (11)               | 13 (21)  | 9 (17)  |
| Do not know            | 3 (2)    | 0 (0)                | 1 (2)    | 2 (4)   |
| Target dose (p=0.343)  |          |                      |          |         |

|                                  |          |         |         |         |
|----------------------------------|----------|---------|---------|---------|
| 1 or 2 g/kg/d                    | 11 (7)   | 6 (13)  | 3 (5)   | 2 (4)   |
| 3 or 4 g/kg/d                    | 146 (91) | 39 (85) | 58 (94) | 49 (93) |
| 5 g/kg/d or higher / Do not know | 4 (3)    | 1 (2)   | 1 (2)   | 2 (4)   |

---

 Glucose

## Initial dose (p=0.504)

|                    |         |         |         |         |
|--------------------|---------|---------|---------|---------|
| 6 g/kg/d           | 73 (45) | 26 (57) | 23 (37) | 24 (45) |
| 7 g/kg/d           | 41 (26) | 8 (17)  | 21 (34) | 12 (23) |
| 8 g/kg/d           | 28 (17) | 6 (13)  | 11 (18) | 11 (21) |
| 9 g/kg/d or higher | 17 (11) | 6 (13)  | 6 (10)  | 5 (9)   |
| Do not know        | 2 (1)   | 0 (0)   | 1 (2)   | 1 (2)   |

## Target dose (p=0.320)

|                     |          |         |         |         |
|---------------------|----------|---------|---------|---------|
| 15 g/kg/d           | 68 (42)  | 24 (52) | 24 (39) | 20 (38) |
| 16 g/kg/d           | 38 (24)  | 9 (20)  | 14 (23) | 15 (28) |
| 17 g/kg/d           | 12 (8)   | 6 (13)  | 4 (7)   | 2 (4)   |
| 18 g/kg/d or higher | 32 (20)  | 5 (11)  | 14 (23) | 13 (25) |
| Do not know         | 11 (6.8) | 2 (4.3) | 6 (9.7) | 3 (5.7) |

---

 Lipids

|    |                                  |          |         |         |         |
|----|----------------------------------|----------|---------|---------|---------|
| 1  |                                  |          |         |         |         |
| 2  |                                  |          |         |         |         |
| 3  |                                  |          |         |         |         |
| 4  |                                  |          |         |         |         |
| 5  | Initiation (p=0.011)             |          |         |         |         |
| 6  |                                  |          |         |         |         |
| 7  | D0                               | 32 (20)  | 10 (22) | 16 (26) | 6 (11)  |
| 8  |                                  |          |         |         |         |
| 9  | D1                               | 77 (48)  | 16 (35) | 31 (50) | 30 (57) |
| 10 |                                  |          |         |         |         |
| 11 | D2                               | 36 (22)  | 11 (24) | 9 (15)  | 16 (30) |
| 12 |                                  |          |         |         |         |
| 13 | D3 or later                      | 16 (10)  | 9 (20)  | 6 (10)  | 1 (2)   |
| 14 |                                  |          |         |         |         |
| 15 | Do not know                      | 0 (0)    | 0 (0)   | 0 (0)   | 0 (0)   |
| 16 |                                  |          |         |         |         |
| 17 | Initial dose (p=0.246)           |          |         |         |         |
| 18 |                                  |          |         |         |         |
| 19 | 0.5 g/kg/d                       | 98 (61)  | 31 (67) | 37 (60) | 30 (57) |
| 20 |                                  |          |         |         |         |
| 21 | 1.0 g/kg/d                       | 59 (37)  | 15 (33) | 22 (36) | 22 (42) |
| 22 |                                  |          |         |         |         |
| 23 | 1.5 g/kg/d or higher             | 3 (2)    | 0 (0)   | 3 (5)   | 0 (0)   |
| 24 |                                  |          |         |         |         |
| 25 | Do not know                      | 1 (1)    | 0 (0)   | 0 (0)   | 1 (2)   |
| 26 |                                  |          |         |         |         |
| 27 | Target dose (p= 0.224)           |          |         |         |         |
| 28 |                                  |          |         |         |         |
| 29 | 1 or 2 g/kg/d                    | 34 (21)  | 15 (33) | 10 (16) | 9 (17)  |
| 30 |                                  |          |         |         |         |
| 31 | 3 or 4 g/kg/d                    | 123 (76) | 30 (65) | 51 (82) | 42 (79) |
| 32 |                                  |          |         |         |         |
| 33 | 5 g/kg/d or higher / Do not know | 4 (3)    | 1 (2)   | 1 (2)   | 2 (4)   |
| 34 |                                  |          |         |         |         |
| 35 |                                  |          |         |         |         |
| 36 | Caloric target (p=0.107)         |          |         |         |         |
| 37 |                                  |          |         |         |         |
| 38 | 90 or 100 kcal/kg/d              | 29 (18)  | 12 (26) | 6 (10)  | 11 (21) |
| 39 |                                  |          |         |         |         |
| 40 |                                  |          |         |         |         |
| 41 |                                  |          |         |         |         |
| 42 |                                  |          |         |         |         |
| 43 |                                  |          |         |         |         |
| 44 |                                  |          |         |         |         |
| 45 |                                  |          |         |         |         |
| 46 |                                  |          |         |         |         |
| 47 |                                  |          |         |         |         |
| 48 |                                  |          |         |         |         |
| 49 |                                  |          |         |         |         |



|                                             |         |         |         |         |
|---------------------------------------------|---------|---------|---------|---------|
| 110 kcal/kg/d                               | 28 (17) | 11 (24) | 7 (11)  | 10 (19) |
| 120 kcal/kg/d                               | 65 (40) | 13 (28) | 32 (52) | 20 (38) |
| 130 or more                                 | 35 (22) | 10 (22) | 14 (23) | 11 (21) |
| Do not know                                 | 4 (3)   | 0 (0)   | 3 (5)   | 1 (2)   |
| Maximal caloric intake prescribed (p=0.199) |         |         |         |         |
| 110 kcal/kg/d                               | 13 (8)  | 5 (11)  | 3 (5)   | 5 (10)  |
| 120 kcal/kg/d                               | 36 (22) | 10 (22) | 10 (16) | 16 (30) |
| 130 kcal/kg/d                               | 32 (20) | 12 (26) | 11 (18) | 9 (17)  |
| 140 kcal/kg/d                               | 37 (23) | 7 (15)  | 19 (31) | 11 (21) |
| 150 kcal/kg/d or more                       | 34 (21) | 12 (26) | 13 (21) | 9 (17)  |
| Do not know                                 | 9 (6)   | 0 (0)   | 6 (10)  | 3 (6)   |

(Percentages do not necessarily sum up to 100% due to rounding)



**Quality of newborn care: Adherence to guidelines for  
parenteral nutrition in preterm infants in in Four European  
Countries**

|                                 |                                                                                                                                                                                                                                                                                                                                                                                                                                                                                                                      |
|---------------------------------|----------------------------------------------------------------------------------------------------------------------------------------------------------------------------------------------------------------------------------------------------------------------------------------------------------------------------------------------------------------------------------------------------------------------------------------------------------------------------------------------------------------------|
| Journal:                        | <i>BMJ Open</i>                                                                                                                                                                                                                                                                                                                                                                                                                                                                                                      |
| Manuscript ID:                  | bmjopen-2013-003478.R1                                                                                                                                                                                                                                                                                                                                                                                                                                                                                               |
| Article Type:                   | Research                                                                                                                                                                                                                                                                                                                                                                                                                                                                                                             |
| Date Submitted by the Author:   | 15-Aug-2013                                                                                                                                                                                                                                                                                                                                                                                                                                                                                                          |
| Complete List of Authors:       | Lapillonne, Alexandre; Paris Descartes University, Assistance Publique-Hôpitaux de Paris, Necker hospital, Department of Neonatal Medicine<br>Carnielli, Virgilio; Polytechnic University of Marche and Salesi's Children Hospital, Azienda Ospedaliero Universitaria Ospedali Riuniti, Division of Neonatology, Department of Clinical Sciences<br>Embleton, Nicholas; Newcastle upon Tyne Hospitals NHS Foundation Trust, Newcastle Neonatal Service<br>Mihatsch, Walter; Pediatric Clinic Harlaching, Neonatology |
| <b>Primary Subject Heading</b>: | Paediatrics                                                                                                                                                                                                                                                                                                                                                                                                                                                                                                          |
| Secondary Subject Heading:      | Nutrition and metabolism, Intensive care                                                                                                                                                                                                                                                                                                                                                                                                                                                                             |
| Keywords:                       | NEONATOLOGY, NUTRITION & DIETETICS, Paediatric intensive & critical care < PAEDIATRICS                                                                                                                                                                                                                                                                                                                                                                                                                               |
|                                 |                                                                                                                                                                                                                                                                                                                                                                                                                                                                                                                      |

SCHOLARONE™  
Manuscripts

Only

1  
2  
3 **Quality of newborn care: Adherence to guidelines for parenteral nutrition in preterm**  
4 **infants in Four European Countries**  
5  
6  
7

8 **Address correspondence to:**

9  
10 Professor Alexandre Lapillonne, Department of Neonatology, APHP Necker-Enfants Malades  
11 hospital, 149 Boulevard Sevres, 75014 Paris, France,  
12

13 Mail: [1](mailto:lapillonne@aphp.fr); tel: +33 (1) 71396542  
14  
15

16 **Authors:** Alexandre Lapillonne<sup>a,b</sup>, MD, PhD, Virgilio Paolo Carnielli<sup>c</sup>, MD, PhD, Nicholas David  
17 Embleton<sup>d</sup>, MBBS, MD, Walter Mihatsch<sup>e</sup>, MD  
18  
19  
20

21 **Author affiliations:**

22 <sup>a</sup>Paris Descartes University, APHP Necker hospital, Paris France; <sup>b</sup>CNRC, Baylor College of Medicine,  
23 Houston, TX, USA; <sup>c</sup>Division of Neonatology, Department of Clinical Sciences, Polytechnic University  
24 of Marche and Salesi's Children Hospital, Azienda Ospedaliero Universitaria Ospedali Riuniti, Ancona,  
25 Italy; <sup>d</sup>Newcastle Neonatal Service, Newcastle upon Tyne Hospitals NHS Foundation Trust, Newcastle  
26 upon Tyne, United Kingdom; <sup>e</sup>Pediatric Clinic Harlaching, Munich, Germany  
27  
28  
29  
30  
31

32 **Running title:** Adherence to guidelines for parenteral nutrition in preterm infants  
33

34 **Key Words:** infant, premature, nutrition survey, feeding methods, parenteral nutrition, guideline  
35  
36  
37  
38

39 **Word count (text)** = 2822

40 **Word count (Abstract)** = 299

41 **Number of references** = 21

42 **Number of figures** = 3

43 **Number of tables** = 4  
44  
45  
46  
47  
48  
49  
50  
51  
52  
53  
54  
55  
56  
57  
58  
59  
60

**ARTICLE SUMMARY –****'Article focus':**

- Optimal nutritional care is critical for neonatal intensive care unit patients and associated with improved outcomes in later life.
- Clinical practice guidelines for parenteral nutrition exist, however, current clinical practice in Europe and compliance with these recommendations is unknown.
- The main objective was to assess the adherence to guidelines for parenteral nutrition in preterm infants in four European Countries.

**'Key messages'**

- The initiation of PN is frequently not compliant with current recommendations, with the main differences observed during the first days of life.
- There is an urgent need to improve dissemination of guidelines and to facilitate translation of knowledge into clinical practice.
- Web-based standard reporting systems that determine the actual compliance of in-house protocols with guidelines should be developed in parallel to determine to what extent new guidelines are translated into clinical practice.

**'Strengths and limitations of this study' section.****Strengths:**

- Nutrition for preterm infants is a hot topic in the field of neonatology.
- Large survey in 4 European countries that included 74% of the units of the 4 countries
- Surveys reflect one of the first steps of the dissemination of guidelines and, thus, provides insight on compliance to guidelines

**Limitations**

- Surveys reflect the intention to treat of the personnel from the NICU that respond to the survey, and may not reflect the actual clinical practice within the unit

**ABSTRACT**

**Objective:** Level of adherence to guidelines should be explored particularly in preterm infants for which poor nutrition has major effects on outcomes in later life. The objective was to evaluate compliance to international guidelines for parenteral nutrition (PN) in preterm infants across Neonatal intensive care units (NICUs) of four European countries.

**Design:** Clinical practice survey by the mean of a questionnaire addressing routine PN protocols, awareness and implementation of guidelines.

**Setting:** NICUs in the United Kingdom, Italy, Germany and France.

**Participants:** One senior physician per unit; 199 units which represent 74% of the NICUs of the 4 countries.

**Primary outcome measure:** Adherence of unit protocol to international guidelines; **Secondary outcome measure:** Factors that influence adherence to guidelines.

**Results:** 80% of the respondents stated that they were aware of some PN clinical practice guidelines. For amino acid infusion (AA), 63% of the respondents aim to initiate AA on D0, 38% aim to administer an initial dose  $\geq 1.5$  g/kg/d and 91% aim for a target dose of 3 or 4 g/kg/d, as recommended. For parenteral lipids, 90% of the respondents aim to initiate parenteral lipids them during the first 3 days of life, 39% aim to use an initial dose  $\geq 1.0$  g/kg/d, and 76% define the target dose as 3 to 4 g/kg/d, as recommended. Significant variations in PN protocols were observed among countries but the type of hospital or the number of admissions per year had only a marginal impact on the PN protocols.

**Conclusions:** Most respondents indicate that their clinical practice was based on common guidelines. However, the initiation of PN is frequently not compliant with current recommendations, with the main differences observed during the first days of life. Continuous education focusing on parenteral nutrition practice is needed, and greater efforts are required to disseminate and implement international guidelines.

**Abbreviations:**

AA – amino acids; D0 –day of birth; ELBW – extremely low birth weight;

EN – enteral nutrition; NICU – neonatal intensive care unit; PN – parenteral nutrition;

UK – United Kingdom; US – United States of America; VLBW – very low birth weight

For peer review only

## INTRODUCTION

Poor nutrition in preterm infants has major effects on outcomes in later life, including physical growth, intellectual development and, possibly, cardiovascular and metabolic effects.[1, 2] The quality and quantity of daily nutritional intake is critical particularly during the first weeks of life since amino acid, energy and lipid intake from parenteral nutrition have been shown to be associated with later development.[3, 4] Reports from neonatal intensive care units (NICUs) worldwide have shown that nutritional intake in preterm infants is inadequate.[5, 6] The causes of this inadequate intake, particularly in the early neonatal phase, may be multifactorial and partly iatrogenic. It may depend not only on the infant's metabolic capacities, but also on the availability and safety of the solutions used, the type of venous access, the department's usual practice, and the prescriber's knowledge of the infant's nutritional needs.[7]

Clinical practice guidelines for the nutritional needs of preterm infants have been regularly revised over recent decades, leading to the development of the most recent international guidelines on paediatric parenteral nutrition (PN) in Europe from the European Society of Paediatric Gastroenterology, Hepatology and Nutrition (ESPGHAN) and the European Society for Clinical Nutrition and Metabolism (ESPEN) in 2005 [8], and globally in the book entitled "Nutritional needs of the preterm infant: Scientific basis and practical guidelines" also published in 2005.[9] (Table 1) Previous studies, especially those performed before current clinical practice guidelines were available, demonstrated large differences in both the nutritional protocols applied in clinical practice and the resulting clinical outcomes.[6, 10, 11] A recent systematic review showed that large differences are observed in the nutritional protocols both among the NICUs in the individual surveys and among surveys.[12]

Level of adherence to guidelines is often not known and it remains unclear to what extent recommendations for early parenteral nutrition in NICU patients have been translated into routine clinical care in Europe. Therefore, we performed a clinical practice survey among NICU physicians in

1  
2  
3 four European countries to evaluate compliance to international guidelines for parenteral nutrition  
4  
5 (PN) in preterm infants and to determine factors that influence compliance to guidelines.  
6  
7  
8

## 9 10 **METHODS**

11 The survey questionnaire was developed under the lead of AL together with the coauthors. The  
12 survey was conducted between October 2009 and April 2010 among NICU physicians in Germany,  
13 the United Kingdom (UK), France and Italy in order to survey ~50 units per country. One author from  
14 each country provided a list of the largest NICUs using available data and their own knowledge of  
15 national and regional units, with at least one senior physician's name per unit. NICUs were selected  
16 for the study if they had high acuity/intensive care beds, and >5 infants per week requiring  
17 parenteral nutrition. The senior physician from each NICU was contacted and asked to complete the  
18 survey questionnaire or delegate the task to a colleague devoting  $\geq 20\%$  of their time to patient care  
19 and with >3 years of clinical experience in neonatal intensive care. Where a response was not  
20 obtained other physicians from the same unit were approached, if available. The identity of the  
21 physicians contacted and requested to complete the survey remained blinded for the analysis and to  
22 all authors.  
23  
24  
25  
26  
27  
28  
29  
30  
31  
32  
33  
34  
35  
36

37 The survey questionnaire was developed in English and translated into German, French and Italian  
38 for use in the national language of each country. For the purpose of the survey, PN was defined as  
39 intravenous nutrition given via a central or peripheral line and containing fluids and any macro- or  
40 micronutrients. Respondents were instructed to consider only in-hospital neonatal intensive care  
41 patients. D0 was defined as the day of birth, D1 for the subsequent 24 h, and D2 and D3 the  
42 following days. The survey comprised sections to characterize the profile of the NICU, and routine  
43 clinical practice with respect to PN. The survey assessed the logistical organization of PN within the  
44 hospital, the types of PN available and prescribed, and some of the reasons for use or non-use of  
45 standard formulations, preferred product characteristics and awareness and implementation of local  
46  
47  
48  
49  
50  
51  
52  
53  
54  
55  
56  
57  
58  
59  
60



1  
2  
3 and international clinical practice guidelines. Only the unit profile, the routine clinical practice with  
4 respect to PN, and awareness and implementation of guidelines were analyzed for this report.  
5  
6

7 The survey was implemented in a web-based format by an independent company (GfK SE Division  
8 HealthCare, Nürnberg, Germany). The authors and the sponsor were blinded with regard to the  
9 respondents' identities and with regard to the individual questionnaires. To best describe the  
10 macronutrient or energy provision, single choice questions were asked offering 6 possible answers, 5  
11 with plausible intakes and one "do not know" response. To assess the extent of agreement with  
12 statements related to awareness and implementation of guidelines, questions were asked using a 7-  
13 point bipolar scale, 1 meant "do not agree at all" and 7 meant "fully agree".  
14  
15  
16  
17  
18  
19  
20  
21

22 Compliance to international guidelines for PN in preterm infants was made mainly by using the  
23 European ones since they have been published in a journal widely disseminated [8] and since they  
24 are also easily and freely accessible through the ESPEN website  
25 (<http://espen.anavaio.com/espencms/index.php/education/espen-guidelines>). NICUs were  
26 considered compliant to guidelines if: for amino acids, initiation = day of birth, initiation dose  $\geq 1.5$   
27 g/kg/d, target dose = 3 to 4 g/kg/d; for glucose, initiation dose  $\geq 7$  g/kg/d, target dose = 10 to 17  
28 g/kg/d; for lipids, initiation  $\leq$  day 3 of life, initiation dose  $\geq 1$  g/kg/d, target dose = 3 to 4 g/kg/d;  
29 energy, target dose = 110 to 120 kcal/kg/d.  
30  
31  
32  
33  
34  
35  
36  
37  
38

#### 39 *Statistical analysis*

40  
41 Analyses were restricted to completed questionnaires with evaluable results. Data were split to  
42 cross tabs with respect to various grouping variables. Since infants with a birth weight below 1500g  
43 are those more likely receiving PN, splitting the data using this parameter was considered to better  
44 reflect the experience in prescribing PN than using the whole population of newborn admitted in a  
45 NICU. Therefore, first class split variables consisted of tertiles or quartiles, which were computed on  
46 the average number of admissions to the neonatal intensive care unit per year by birth weight up to  
47 1500 g. The second class of grouping factors comprised categorical variables such as hospital type or  
48  
49  
50  
51  
52  
53  
54  
55  
56  
57  
58  
59  
60

country. The goal was to examine the null hypothesis “No pairwise differences in proportions across subgroups”. Null hypotheses were tested using  $\chi^2$ -tests and rejected at the 5% error level.

### *Ethics*

This study was conducted according to the guidelines in the Declaration of Helsinki. Since this study did not involve human subjects/patients or handling of medical records, ethical approval was not required.

## **RESULTS**

### **Profile of the NICUs surveyed**

A total of 199 NICUs were surveyed (45 from the UK, 55 from Germany, 49 from France and 50 from Italy) and their characteristics are presented in table 2. Overall, we surveyed 74% of the units of the 4 countries: 45/64 (70%) in the UK; 55/78 (71%) in Germany; 49/66 (74%) in France; 50/60 (83%) in Italy). One hundred sixty one of the 199 (81%) surveys were included in the analysis as 38 surveys were excluded due to invalid responses. The majority of invalid surveys came from units with the lower number of high acuity care beds (i.e., 50% of them had  $\leq 5$  high acuity care beds vs. 12%;  $p < 0.001$ ). The number of years of practice in neonatology of the physicians who completed the survey questionnaire was more than 10 years for 141 of them (71%), 5 to 9 years for 40 of them (20%), 3 to 5 years for 17 of them (8.5%) and 1 to 3 years for 1 of them (0.5%).

### **Adherence of unit protocol to international guidelines**

Survey respondents were requested to provide information on the timing and composition of PN as summarized in table 3. Level of adherence of unit protocols to international guidelines was highly variable and varied according to the type of macronutrient (Figure 1). With regards to initiation of PN, amino acids were often initiated late, and both lipids and amino acids were initiated at a lower dose than recommended (Figure 1). With regards to full parenteral nutrition (i.e., target dose), most NICUs reported an adequate target dose for amino acids, lipids and glucose. In contrast, only half of

1  
2  
3 the units reported a target energy intake compliant with guidelines; ~20% reported a lower higher  
4 target than recommended and a similar percentage a higher target than recommended.  
5  
6

### 7 **Factors that influence adherence to guidelines**

#### 9 *Country, hospital type and size of unit.*

10  
11 There was a significant effect of countries on PN practices (Table 3). The patterns observed were the  
12 following: with regards to early PN, amino acids were started sooner and at a higher dose in France  
13 than in the other countries. A similar trend was seen for lipids in the UK where the starting dose of  
14 glucose was also higher than in the other countries. With regards to full PN (i.e., target dose), amino  
15 acid target dose was more likely within the recommendations in France than in other countries  
16 whereas glucose target dose was more likely within the recommendations in the UK and in Italy. The  
17 distribution for caloric target was wide; the units in France and Germany were more likely  
18 prescribing higher energy intake than recommended whereas lower energy intake was more likely  
19 seen in the UK and Italy.  
20  
21

22  
23 When the PN results were stratified by hospital type, no differences were observed in the initiation,  
24 starting or target dose of amino acids (Data not shown). University or teaching hospitals reported  
25 higher starting doses of glucose than other types of hospital (40% vs. 56% at 6 g/kg/d and 32% vs.  
26 13% at 7 g/kg/d;  $p=0.022$ ), but there was no significant difference in the target dose between the  
27 two types of institution. University or teaching hospitals also reported initiation of lipid feeding  
28 earlier than other institutions (initiation on D3 or later 5% vs. 20%;  $p=0.015$ ), but with no significant  
29 difference in starting or target dose. The caloric targets between the two types of hospital were  
30 similar, but the normal maximal caloric intake prescribed were significantly different ( $p=0.008$ ).  
31  
32

33  
34 When the data were stratified by the number of admissions, the only category in which a significant  
35 difference was apparent was the day on which lipid feeding was initiated. Units with lower  
36 admissions rates were more likely to report initiation on D3 or later ( $p=0.011$ ) (Data not shown).  
37  
38

#### 39 *Awareness of nutritional guidelines*

1  
2  
3 Eighty percent of physicians across all countries reported an awareness of nutritional guidelines, but  
4  
5 less than 50% gave a source or specification (Table 4). There were inter-country differences for  
6  
7 physicians reporting an awareness of clinical practice guidelines for neonatal or pediatric PN (Table  
8  
9 4). There was no significant association between being aware of guidelines for use of neonatal /  
10  
11 pediatric PN and being compliant with international guidelines, but there was a trend for an  
12  
13 association between being aware of guidelines and being compliant for the lipid target dose  
14  
15 ( $p=0.054$ ) and for the initiation of amino acids ( $p=0.070$ ).

16  
17 Respondents indicated that they agreed with most of the recommendations, with 66% and 70% of  
18  
19 physicians from Germany and France and 46% and 53% in UK and Italy in strong agreement (Figure  
20  
21 2). Overall, the physicians agreed less strongly with the statement “I obtain a copy, read and follow  
22  
23 guidelines for parenteral nutrition in pediatric patients as soon as they become available” (Figure 2).  
24  
25 When asked whether the lack of robust evidence on which the guidelines are based presented a  
26  
27 barrier to implementation, 3% and 7% of the physicians from France and Italy agreed, in comparison  
28  
29 to 9% and 12% of the respondents from Germany and the UK (Figure 3). About 60-70% of the  
30  
31 physicians did not find current guidelines too complex and those from both the UK and Italy more  
32  
33 often found the guidelines to be too theoretical to be used in clinical practice than respondents from  
34  
35 Germany or France. Respondents from Germany were most likely to report relying on internal  
36  
37 clinical practice protocols (Figure 3).  
38  
39  
40  
41  
42  
43

## 44 **DISCUSSION**

45  
46 This study represents the first survey of neonatal PN clinical practice behavior undertaken at the  
47  
48 European level. This type of survey emphasizes how current practices differ from recommended  
49  
50 guidelines and encourage clinicians to be aware of the potential for improvement. Since the  
51  
52 objective of the study was to compare the data with international guidelines we did not report  
53  
54 and/or use local guidelines, if any, and for consistency, we mainly used for comparison the European  
55  
56  
57  
58  
59  
60

1  
2  
3 guidelines which are widely available through both a publication widely referenced [8] and a  
4  
5 website.

6  
7 Despite demonstrating apparent improvement in PN practices, the results presented here shows  
8  
9 that 37% of neonatal units in the 4 European countries surveyed initiate amino acid feeding on D1 or  
10  
11 later and not on D0 as recommended.[8] Moreover, 60% of the European respondents administer an  
12  
13 initial dose of less than the required 1.5 g/kg/d to prevent a negative balance.[8] The apparent  
14  
15 higher compliance with guideline recommendations to initiate amino acid infusion on D0 and a  
16  
17 target dose of 3-4 g/kg/d in France may be attributable to a combination of commercially available  
18  
19 binary standard solutions and/or awareness of a national survey on this topic and widely  
20  
21 disseminated at the country level.[13]

22  
23 Our study shows that whilst 90% of the NICUs surveyed provide early lipids, 21% of them provide a  
24  
25 maximum dose lower than recommended. This is similar to other surveys suggesting that physicians  
26  
27 do not comply easily with the guideline defining the optimal dose for parenteral lipids. Previous  
28  
29 surveys have shown that the timing and dose of parenteral lipids vary between surveys to a scale  
30  
31 which is larger than that for amino acids.[12] It was also found that there was a lack of consensus  
32  
33 between surveys on the contraindications for lipids and/or indication for stopping lipids. This may  
34  
35 reflect the lack of scientific data and absence of clear guidance on this topic.

36  
37 Awareness of some guidelines was reported by the majority of physicians completing the survey,  
38  
39 although 21% claimed not to be aware of any guidelines. This may be of relevance when the 40% of  
40  
41 respondents who do not provide amino acids on the day of birth are considered, highlighting a  
42  
43 potential deficit in implementation of the guidelines. Limited access to standard solutions and  
44  
45 specific country regulations on preparation may also be possible alternative explanations why  
46  
47 guidelines have not been translated into clinical practice.

48  
49 University/teaching hospitals provided a higher starting dose of glucose and initiated lipid and amino  
50  
51 acid infusion earlier compared to other institutions. Similarly, late initiation of lipid infusion (D3 or  
52  
53 later) was less common in NICUs with a highest number of admissions per year. While these results  
54  
55  
56  
57  
58

1  
2  
3 may suggest better adherence to treatment guidelines at hospitals with a high number of  
4  
5 admissions, the existing data are unclear as to whether high numbers of admissions are also  
6  
7 associated with lower rates of mortality or morbidity.[14, 15]  
8

9  
10 The methodological limitations of using surveys for the assessment of nutritional protocols have  
11  
12 been previously discussed in detail [13] and it should be reiterated that these surveys reflect the  
13  
14 intention to treat of the personnel from the NICU that respond to the survey, and may not reflect  
15  
16 the actual clinical practice within the unit. Nevertheless, intention to treat reflects one of the first  
17  
18 steps of the dissemination of guidelines and, thus, provides insight on compliance to guidelines. The  
19  
20 number of countries participating in our survey was limited to 4 for practical reasons and, therefore,  
21  
22 the results obtained do not permit conclusions that apply to other European countries. The number  
23  
24 of surveys received represents a substantial proportion of NICUs in each of the 4 countries; however,  
25  
26 the number of invalid surveys indicates that there may have been some confusion with respect to  
27  
28 terminology or intent. Interestingly, the invalid responses were mainly seen in the smaller units  
29  
30 which are less likely to prescribe PN.  
31  
32

33  
34 Finally, our results allow comparison of current practices among countries but also historical  
35  
36 comparison with similar surveys published earlier.[12] When compared to studies performed in the  
37  
38 United States [16] or individual European countries [17-20], our study shows that PN in preterm  
39  
40 neonates is provided earlier and in higher volumes than in the past, reflecting changing clinical  
41  
42 practice in response to increased knowledge about parenteral feeding in neonates, even if the  
43  
44 practices are still not perfectly in line with guidelines.  
45

46  
47 In conclusion, most respondents indicate that their clinical practice was based on common  
48  
49 guidelines. However, the initiation of PN in the 4 countries surveyed is frequently not compliant with  
50  
51 current recommendations, with the main differences observed during the first days of life. Our study  
52  
53 shows that there is an urgent need to improve dissemination of guidelines and to facilitate  
54  
55 translation of knowledge into clinical practice. Given the need for continuous monitoring, it would  
56  
57 be of value for scientific societies (particularly those that publish guidelines) to develop web-based  
58  
59  
60

1  
2  
3 standard reporting systems that determine the actual compliance of in-house protocols with  
4  
5 guidelines. In the case of the nutrition for preterm infants, a limited number of questions on access  
6  
7 to PN and the dose of nutrients given would be sufficient to provide insight on the implementation  
8  
9 of guidelines at a local level.  
10

#### 11 12 13 **ACKNOWLEDGEMENTS**

14  
15 The authors thank Istvan Szabo, Ines Pereira da Silva Lopes and Michael Imeokparia from Baxter  
16  
17 Healthcare (Glattpark, Switzerland) for their insightful contribution to the project. Editorial  
18  
19 assistance was provided by Physicians World Europe GmbH (Mannheim, Germany), sponsored by  
20  
21 Baxter Healthcare. The authors thank the Association pour la Recherche et la Formation En  
22  
23 Neonatologie (ARFEN) for providing technical assistance. Special thanks go to all the physicians who  
24  
25 have completed the questionnaire for their contribution.  
26  
27  
28  
29

#### 30 31 **FUNDING SOURCE**

32 This study was sponsored by Baxter Healthcare (Glattpark, Switzerland) who provided support for  
33  
34 the development and implementation of the survey, face-to-face meetings, and writing of  
35  
36 manuscript. All authors have received an unrestricted institutional grant from Baxter Healthcare for  
37  
38 coordinating the study in their own country.  
39

#### 40 41 **CONFLICT OF INTEREST STATEMENT:**

42 The authors have no conflicts of interest relevant to this article to disclose.  
43  
44  
45  
46

#### 47 48 **CONTRIBUTORSHIP**

49 Alexandre Lapillonne served as one of the coordinators for the survey and participated in two face-to-  
50  
51 face meetings to discuss the results. The manuscript was drafted by Alexandre Lapillonne. He also  
52  
53 participated in the review, revision and approval of the manuscript and had access to all of the primary  
54  
55 data.  
56  
57

1  
2  
3 Virgilio P. Carnielli served as one of the coordinators for the survey and participated in two face-to-face  
4 meetings to discuss the results. He also participated in the review, revision and approval of the  
5 manuscript and had access to all of the primary data.  
6  
7

8  
9  
10 Nicholas D. Embleton served as one of the coordinators for the survey and participated in two face-to-  
11 face meetings to discuss the results. He also participated in the review, revision and approval of the  
12 manuscript and had access to all of the primary data.  
13

14  
15  
16 Walter Mihatsch served as one of the coordinators for the survey and participated in two face-to-face  
17 meetings to discuss the results. He also participated in the review, revision and approval of the  
18 manuscript and had access to all of the primary data.  
19  
20

## 21 22 23 **DATA SHARING**

24 See materials et methods section: "The survey assessed the logistical organization of PN within the  
25 hospital, the types of PN available and prescribed, and some of the reasons for use or non-use of  
26 standard formulations, preferred product characteristics and awareness and implementation of local and  
27 international clinical practice guidelines. Only the unit profile, clinical practice parameters and awareness  
28 and implementation of guidelines were analyzed for this report."  
29  
30

31 The data are available to the authors and the sponsor.  
32  
33  
34  
35  
36  
37  
38  
39  
40  
41  
42  
43  
44  
45  
46  
47  
48  
49  
50  
51  
52  
53  
54  
55  
56  
57  
58  
59  
60



## REFERENCES

1. Isaacs EB, Gadian DG, Sabatini S, et al. **The effect of early human diet on caudate volumes and IQ.** *Pediatr Res* 2008, **63**(3):308-314.
2. Lapillonne A, Griffin IJ: **Feeding preterm infants today for later metabolic and cardiovascular outcomes.** *J Pediatr* 2013, **162**(3 Suppl):S7-16.
3. dit Trolli SE, Kermorvant-Duchemin E, Huon C, Bremond-Gignac D, Lapillonne A: **Early lipid supply and neurological development at one year in very low birth weight (VLBW) preterm infants.** *Early Hum Dev* 2012, **88** Suppl 1:S25-29.
4. Stephens BE, Walden RV, Gargus RA, et al. **First-week protein and energy intakes are associated with 18-month developmental outcomes in extremely low birth weight infants.** *Pediatrics* 2009, **123**(5):1337-1343.
5. Martin CR, Brown YF, Ehrenkranz RA, et al. **Nutritional practices and growth velocity in the first month of life in extremely premature infants.** *Pediatrics* 2009, **124**(2):649-657.
6. Olsen IE, Richardson DK, Schmid CH, et al. **Intersite differences in weight growth velocity of extremely premature infants.** *Pediatrics* 2002, **110**(6):1125-1132.
7. Corpeleijn WE, Vermeulen MJ, van den Akker CH, et al. **Feeding very-low-birth-weight infants: our aspirations versus the reality in practice.** *Ann Nutr Metab* 2011, **58** Suppl 1:20-29.
8. Koletzko B, Goulet O, Hunt J, et al. **1. Guidelines on Paediatric Parenteral Nutrition of the European Society of Paediatric Gastroenterology, Hepatology and Nutrition (ESPGHAN) and the European Society for Clinical Nutrition and Metabolism (ESPEN), Supported by the European Society of Paediatric Research (ESPR).** *J Pediatr Gastroenterol Nutr* 2005, **41** Suppl 2:S1-87.
9. Tsang R, Uauy R, Koletzko B, et al. **Nutritional Needs of the Preterm Infant: Scientific Basis and Practical Guidelines.** Cincinnati, OH; 2005.
10. Blackwell MT, Eichenwald EC, McAlmon K, et al. **Interneonatal intensive care unit variation in growth rates and feeding practices in healthy moderately premature infants.** *J Perinatol* 2005, **25**(7):478-485.
11. Clark RH, Thomas P, Peabody J: **Extrauterine growth restriction remains a serious problem in prematurely born neonates.** *Pediatrics* 2003, **111**(5 Pt 1):986-990.
12. Lapillonne A, Kermorvant-Duchemin E: **Parenteral Nutrition for NICU Patients – A Systematic Review of Current Practice Surveys** *J Nutr* in press.
13. Lapillonne A, Fellous L, Mokthari M, et al. **Parenteral nutrition objectives for very low birth weight infants: results of a national survey.** *J Pediatr Gastroenterol Nutr* 2009, **48**(5):618-626.
14. Phibbs CS, Baker LC, Caughey AB, et al. **Level and volume of neonatal intensive care and mortality in very-low-birth-weight infants.** *N Engl J Med* 2007, **356**(21):2165-2175.
15. Horbar JD, Badger GJ, Lewit EM, et al. **Hospital and patient characteristics associated with variation in 28-day mortality rates for very low birth weight infants. Vermont Oxford Network.** *Pediatrics* 1997, **99**(2):149-156.
16. Hans DM, Pylipow M, Long JD, et al. **Nutritional practices in the neonatal intensive care unit: analysis of a 2006 neonatal nutrition survey.** *Pediatrics* 2009, **123**(1):51-57.

17. Grover A, Khashu M, Mukherjee A, et al. **Iatrogenic malnutrition in neonatal intensive care units: urgent need to modify practice.** *JPEN Journal of parenteral and enteral nutrition* 2008, **32**(2):140-144.
18. Lapillonne A, Fellous L, Kermorvant-Duchemin E: **Use of parenteral lipid emulsions in French neonatal ICUs.** *Nutrition in clinical practice : official publication of the American Society for Parenteral and Enteral Nutrition* 2011, **26**(6):672-680.
19. Ahmed M, Irwin S, Tuthill DP: **Education and evidence are needed to improve neonatal parenteral nutrition practice.** *JPEN J Parenter Enteral Nutr* 2004, **28**(3):176-179.
20. Fleming P, Chong A, Woolhead E, et al. **A national survey of current practice in the management of very low and extremely low birth weight infants: is there a role for national guidelines?** *Irish medical journal* 2008, **101**(10):310-313.
21. Powers RW, Catov JM, Bodnar LM, et al. **Evidence of endothelial dysfunction in preeclampsia and risk of adverse pregnancy outcome.** *Reprod Sci* 2008, **15**(4):374-381.

1  
2  
3 **Figure legends**  
4  
5  
6

7 **Figure 1.** Percentage of NICUs (n=161) in Germany, France Italy and the United Kingdom compliant  
8 to guidelines for parenteral nutrition in preterm infants. NICUs were considered compliant to  
9 guidelines if: for amino acids, initiation = day of birth, initiation dose  $\geq 1.5$  g/kg/d, target dose = 3 to 4  
10 g/kg/d; for glucose, initiation dose  $\geq 7$  g/kg/d, target dose = 10 to 17 g/kg/d; for lipids, initiation  $\leq$  day  
11 3 of life, initiation dose  $\geq 1$  g/kg/d, target dose = 3 to 4 g/kg/d; energy, target dose = 110 to 120  
12 kcal/kg/d.  
13  
14  
15  
16  
17  
18  
19

20  
21  
22 **Figure 2.** Use of international clinical practice recommendations to guide neonatal parenteral  
23 nutrition by country.  
24  
25  
26  
27

28  
29 **Figure 3.** Justification for non-implementation of international clinical practice guidelines by country.  
30  
31  
32  
33  
34  
35  
36  
37  
38  
39  
40  
41  
42  
43  
44  
45  
46  
47  
48  
49  
50  
51  
52  
53  
54  
55  
56  
57  
58  
59  
60

**Tables****Table 1.** International recommendations for parenteral nutrition in preterm infants.

|                        | Tsang et al., 2005[9]                            | ESPEN/ESPGHAN/ESPR guidelines, 2005[8] |
|------------------------|--------------------------------------------------|----------------------------------------|
| <b>Amino acids</b>     |                                                  |                                        |
| initiation             | day of birth                                     | day of birth                           |
| initial dose, g/kg/d   | 2                                                | ≥1.5                                   |
| target dose, g/kg/d    | 3.5-4 (ELBW)<br>3.2-3.8 (VLBW)                   | maximum 4                              |
| <b>Glucose</b>         |                                                  |                                        |
| initiation             | day of birth                                     | day of birth                           |
| initial dose, g/kg/d   | 7                                                | 5.8-11.5                               |
| target dose, g/kg/d    | 13-17 (ELBW)<br>9.7-15 (VLBW)                    | --                                     |
| <b>Lipids</b>          |                                                  |                                        |
| initiation             | day of birth (VLBW)<br>Cautious support for ELBW | No later than 3 <sup>rd</sup> day      |
| initial dose, g/kg/d   | ≥1                                               | Linoleic acid >0.25 mg/kg/d            |
| target dose, g/kg/d    | 3-4                                              | 3-4                                    |
| <b>Energy</b>          |                                                  |                                        |
| caloric target, g/kg/d | 105-115 (ELBW)<br>90-100 (VLBW)                  | 110-120                                |

VLBW: very low birth weight infants; ELBW: extremely low birth weight infants; --, no recommendation provided  
 ESPEN/ESPGHAN/ESPR, European Society for Clinical Nutrition and Metabolism, European Society of Paediatric Gastroenterology, Hepatology and Nutrition, European Society of Paediatric Research

**Table 2.** Characteristics of participating NICUs.

| Characteristic                         | TOTAL       | Germany    | UK           | France       | Italy      |
|----------------------------------------|-------------|------------|--------------|--------------|------------|
| Questionnaires received, n             | 199         | 55         | 45           | 49           | 50         |
| Questionnaires analyzed, n             | 161         | 54         | 39           | 49           | 19         |
| Type of hospital, n (%)                |             |            |              |              |            |
| University/teaching hospital           | 106 (66)    | 44 (82)    | 27 (69)      | 31 (63)      | 4 (21)     |
| Non-university                         | 55 (34)     | 10 (19)    | 12 (31)      | 18 (37)      | 15 (79)    |
| Highest acuity beds per unit, n (%)    |             |            |              |              |            |
| 1-5                                    | 19 (12)     | 2 (4)      | 8 (21)       | 3 (6)        | 6 (32)     |
| 6-10                                   | 73 (45)     | 22 (41)    | 21 (54)      | 23 (47)      | 7 (37)     |
| 11-15                                  | 45 (28)     | 18 (33)    | 5 (13)       | 19 (39)      | 3 (16)     |
| ≥16                                    | 24 (15)     | 12 (22)    | 5 (13)       | 4 (8)        | 3 (16)     |
| Intermediate care beds per unit, n (%) |             |            |              |              |            |
| 1-5                                    | 30 (19)     | 13 (24)    | 5 (13)       | 4 (8)        | 8 (42)     |
| 6-10                                   | 56 (35)     | 16 (30)    | 15 (39)      | 17 (35)      | 8 (42)     |
| 11-15                                  | 33 (21)     | 9 (17)     | 6 (15)       | 15 (31)      | 3 (16)     |
| ≥16                                    | 38 (24)     | 14 (26)    | 13 (33)      | 11 (22)      | 6 (12)     |
| NR                                     | 4 (3)       | 2 (4)      | 0 (0)        | 2 (4)        | 0 (0)      |
| VLBW infants per year, median (IQR)    | 90 (129-60) | 64 (86-40) | 105 (160-80) | 125 (195-98) | 75 (90-55) |

NR, no response

VLBW, very low birth weight

IQR, interquartile range

(Percentages do not necessarily sum up to 100% due to rounding)

**Table 3.** Current practice for parenteral nutrition in NICU patients by country.

| Nutrient                         | TOTAL<br>n (%)  | Germany<br>n (%) | UK<br>n (%)    | France<br>n (%)   | Italy<br>n (%) |
|----------------------------------|-----------------|------------------|----------------|-------------------|----------------|
| Amino acids                      |                 |                  |                |                   |                |
| Initiation (p=0.005)             |                 |                  |                |                   |                |
| <b>D0</b>                        | <b>101 (63)</b> | <b>32 (59)</b>   | <b>21 (54)</b> | <b>41 (84)</b>    | <b>7 (37)</b>  |
| D1                               | 51 (32)         | 19 (35)          | 15 (39)        | 8 (16)            | 9 (47)         |
| D2 or later                      | 9 (6)           | 3 (6)            | 3 (8)          | 0 (0)             | 3 (16)         |
| Initial dose (p=0.001)           |                 |                  |                |                   |                |
| 0.5 g/kg/d                       | 44 (27)         | 20 (37)          | 11 (28)        | 5 (10)            | 8 (42)         |
| 1.0 g/kg/d                       | 53 (33)         | 14 (26)          | 9 (23)         | 24 (49)           | 6 (32)         |
| <b>1.5 g/kg/d</b>                | <b>34 (21)</b>  | <b>5 (9)</b>     | <b>11 (28)</b> | <b>15 (31)</b>    | <b>3 (16)</b>  |
| <b>2 g/kg/d or higher</b>        | <b>27 (17)</b>  | <b>15 (28)</b>   | <b>5 (13)</b>  | <b>5 (10)</b>     | <b>2 (11)</b>  |
| Do not know                      | 3 (2)           | 0 (0)            | 3 (8)          | 0 (0)             | 0 (0)          |
| Target dose (p<0.001)            |                 |                  |                |                   |                |
| 1 or 2 g/kg/d                    | 11 (7)          | 6 (11)           | 3 (8)          | 0 (0)             | 2 (11)         |
| <b>3 or 4 g/kg/d</b>             | <b>146 (91)</b> | <b>48 (89)</b>   | <b>34 (87)</b> | <b>49 (100.0)</b> | <b>15 (79)</b> |
| 5 g/kg/d or higher / Do not know | 4 (3)           | 0 (0)            | 2 (5)          | 0 (0)             | 2 (11)         |
| Glucose                          |                 |                  |                |                   |                |
| Initial dose (p<0.001)           |                 |                  |                |                   |                |
| 6 g/kg/d                         | 73 (45)         | 27 (50)          | 12 (31)        | 19 (39)           | 15 (79)        |
| <b>7 g/kg/d</b>                  | <b>41 (26)</b>  | <b>18 (33)</b>   | <b>3 (8)</b>   | <b>18 (37)</b>    | <b>2 (11)</b>  |
| <b>8 g/kg/d</b>                  | <b>28 (17)</b>  | <b>6 (11)</b>    | <b>9 (23)</b>  | <b>12 (25)</b>    | <b>1 (5)</b>   |
| <b>9 g/kg/d or higher</b>        | <b>17 (11)</b>  | <b>3 (6)</b>     | <b>13 (33)</b> | <b>0 (0)</b>      | <b>1 (5)</b>   |
| Do not know                      | 2 (1)           | 0 (0)            | 2 (5)          | 0 (0)             | 0 (0)          |
| Target dose (p<0.001)            |                 |                  |                |                   |                |
| <b>15 g/kg/d</b>                 | <b>68 (42)</b>  | <b>22 (41)</b>   | <b>21 (54)</b> | <b>8 (16)</b>     | <b>17 (90)</b> |

|                                                       |                 |                |                |                |                |
|-------------------------------------------------------|-----------------|----------------|----------------|----------------|----------------|
| 16 g/kg/d                                             | <b>38 (24)</b>  | <b>14 (26)</b> | <b>5 (13)</b>  | <b>18 (37)</b> | <b>1 (5)</b>   |
| 17 g/kg/d                                             | <b>12 (8)</b>   | <b>5 (9)</b>   | <b>2 (5)</b>   | <b>5 (10)</b>  | <b>0 (0)</b>   |
| 18 g/kg/d or higher                                   | 32 (20)         | 10 (19)        | 3 (8)          | 18 (37)        | 1 (5)          |
| Do not know                                           | 11 (7)          | 3 (6)          | 8 (21)         | 0 (0)          | 0 (0)          |
| <b>Lipids</b>                                         |                 |                |                |                |                |
| Initiation (p=0.160)                                  |                 |                |                |                |                |
| <b>D0</b>                                             | <b>32 (20)</b>  | <b>12 (22)</b> | <b>12 (31)</b> | <b>3 (6)</b>   | <b>5 (26)</b>  |
| <b>D1</b>                                             | <b>77 (48)</b>  | <b>24 (44)</b> | <b>17 (44)</b> | <b>28 (57)</b> | <b>8 (42)</b>  |
| <b>D2</b>                                             | <b>36 (22)</b>  | <b>11 (20)</b> | <b>9 (23)</b>  | <b>11 (22)</b> | <b>5 (26)</b>  |
| D3 or later                                           | 16 (10)         | 7 (13)         | 1 (3)          | 7 (14)         | 1 (5)          |
| Do not know                                           | 0 (0)           | 0 (0)          | 0 (0)          | 0 (0)          | 0 (0)          |
| Initial dose (p<0.001)                                |                 |                |                |                |                |
| 0.5 g/kg/d                                            | 98 (61)         | 34 (63)        | 11 (28)        | 36 (74)        | 17 (90)        |
| <b>1.0 g/kg/d</b>                                     | <b>59 (37)</b>  | <b>18 (33)</b> | <b>27 (70)</b> | <b>13 (27)</b> | <b>1 (5)</b>   |
| <b>1.5 g/kg/d or higher</b>                           | <b>3 (2)</b>    | <b>2 (4)</b>   | <b>0 (0)</b>   | <b>0 (0)</b>   | <b>1 (5)</b>   |
| Do not know                                           | 1 (1)           | 0 (0)          | 1 (3)          | 0 (0)          | 0 (0)          |
| Target dose (p= 0.028)                                |                 |                |                |                |                |
| 1 or 2 g/kg/d                                         | 34 (21)         | 15 (28)        | 3 (8)          | 9 (18)         | 7 (37)         |
| <b>3 or 4 g/kg/d</b>                                  | <b>123 (76)</b> | <b>38 (70)</b> | <b>33 (85)</b> | <b>40 (82)</b> | <b>12 (63)</b> |
| 5 g/kg/d or higher / Do not know                      | 4 (3)           | 1 (2)          | 3 (8)          | 0 (0)          | 0 (0)          |
| <b>Caloric target (p&lt;0.001)</b>                    |                 |                |                |                |                |
| 90 or 100 kcal/kg/d                                   | 29 (18)         | 3 (6)          | 15 (39)        | 3 (6)          | 8 (42)         |
| <b>110 kcal/kg/d</b>                                  | <b>28 (17)</b>  | <b>8 (15)</b>  | <b>6 (15)</b>  | <b>11 (22)</b> | <b>3 (16)</b>  |
| <b>120 kcal/kg/d</b>                                  | <b>65 (40)</b>  | <b>25 (46)</b> | <b>10 (26)</b> | <b>26 (53)</b> | <b>4 (21)</b>  |
| 130 or more                                           | 35 (22)         | 18 (33)        | 4 (10)         | 9 (18)         | 4 (21)         |
| Do not know                                           | 4 (3)           | 0 (0)          | 4 (10)         | 0 (0)          | 0 (0)          |
| <b>Maximal caloric intake prescribed (p&lt;0.001)</b> |                 |                |                |                |                |
| 110 kcal/kg/d                                         | 13 (8)          | 1 (2)          | 7 (18)         | 3 (6)          | 2 (11)         |

|                       |         |         |         |         |        |
|-----------------------|---------|---------|---------|---------|--------|
| 120 kcal/kg/d         | 36 (22) | 9 (17)  | 12 (31) | 9 (18)  | 6 (32) |
| 130 kcal/kg/d         | 32 (20) | 10 (19) | 4 (10)  | 12 (25) | 6 (32) |
| 140 kcal/kg/d         | 37 (23) | 16 (30) | 2 (5)   | 18 (37) | 1 (5)  |
| 150 kcal/kg/d or more | 34 (21) | 18 (33) | 6 (15)  | 6 (12)  | 4 (21) |
| Do not know           | 9 (6)   | 0 (0)   | 8 (21)  | 1 (2)   | 0 (0)  |

D0, D1, D2; day 0, day 1, day 2

(Percentages do not necessarily sum up to 100% due to rounding)

Recommended intakes as defined in the methods section are highlighted in bold



**Table 4.** Guideline awareness by country.

| Question                                                                                 | TOTAL<br>n (%) | Germany<br>n (%) | UK<br>n (%) | France<br>n (%) | Italy<br>n (%) |
|------------------------------------------------------------------------------------------|----------------|------------------|-------------|-----------------|----------------|
| <b>Are you aware of guidelines for use of neonatal / pediatric parenteral nutrition?</b> |                |                  |             |                 |                |
| Yes                                                                                      | 128 (80)       | 47 (87)          | 33 (85)     | 33 (67)         | 15 (79)        |
| No                                                                                       | 33 (21)        | 7 (13)           | 6 (15)      | 16 (33)         | 4 (21)         |
| <b>Of which guidelines are you aware?*</b>                                               |                |                  |             |                 |                |
| International [8, 21]                                                                    | 33 (26)        | 10 (21)          | 9 (27)      | 10 (30)         | 4 (27)         |
| National                                                                                 | 24 (19)        | 16 (34)          | 2 (6)       | 0 (0)           | 6 (40)         |
| In-house guidelines                                                                      | 8 (6)          | 4 (9)            | 2 (6)       | 0 (0)           | 2 (13)         |
| None specifically named/other                                                            | 66 (52)        | 19 (40)          | 17 (52)     | 24 (73)         | 6 (40)         |

\*More than one answer per questionnaire possible.

(Percentages do not necessarily sum up to 100% due to rounding)

1  
2  
3  
4  
5  
6  
7  
8  
9  
10  
11  
12  
13  
14  
15  
16  
17  
18  
19  
20  
21  
22  
23  
24  
25  
26  
27  
28  
29  
30  
31  
32  
33  
34  
35  
36  
37  
38  
39  
40  
41  
42  
43  
44  
45  
46  
47  
48  
49  
50  
51  
52  
53  
54  
55  
56  
57  
58  
59  
60

Figure 1

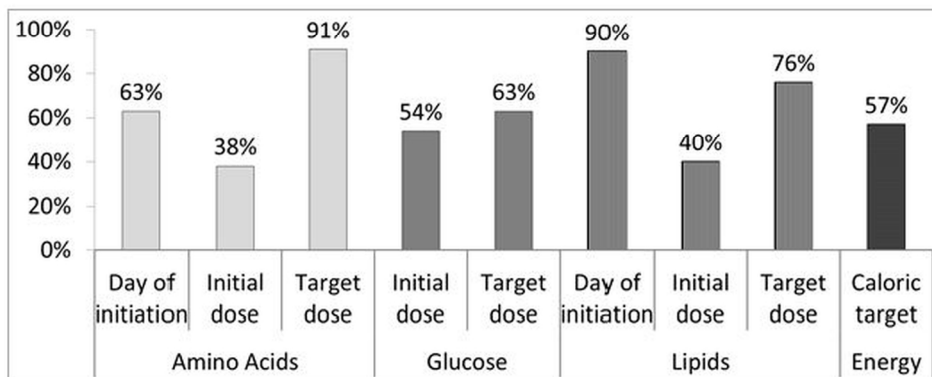

146x90mm (300 x 300 DPI)

Review only

1  
2  
3  
4  
5  
6  
7  
8  
9  
10  
11  
12  
13  
14  
15  
16  
17  
18  
19  
20  
21  
22  
23  
24  
25  
26  
27  
28  
29  
30  
31  
32  
33  
34  
35  
36  
37  
38  
39  
40  
41  
42  
43  
44  
45  
46  
47  
48  
49  
50  
51  
52  
53  
54  
55  
56  
57  
58  
59  
60

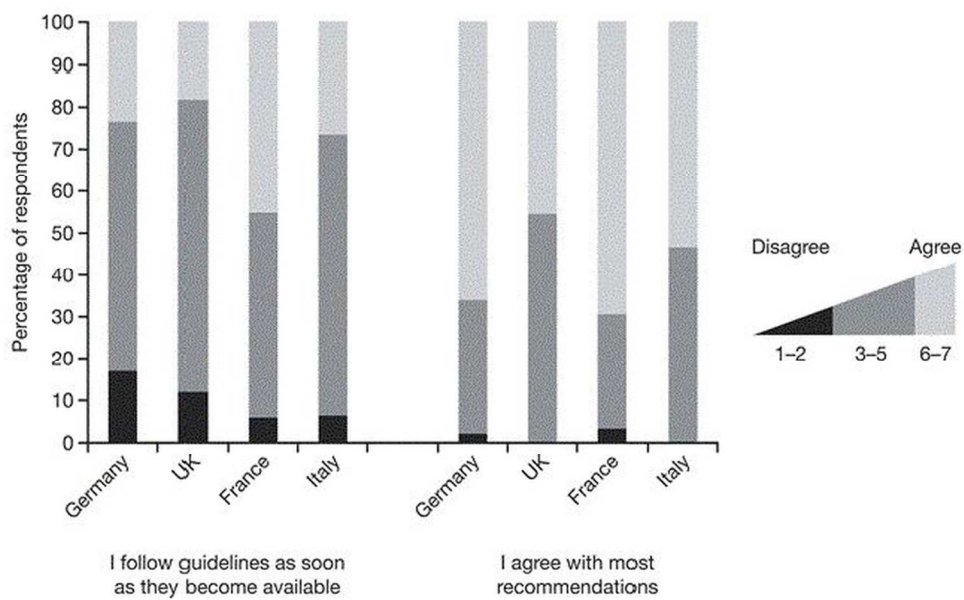

139x90mm (300 x 300 DPI)

Review only

1  
2  
3  
4  
5  
6  
7  
8  
9  
10  
11  
12  
13  
14  
15  
16  
17  
18  
19  
20  
21  
22  
23  
24  
25  
26  
27  
28  
29  
30  
31  
32  
33  
34  
35  
36  
37  
38  
39  
40  
41  
42  
43  
44  
45  
46  
47  
48  
49  
50  
51  
52  
53  
54  
55  
56  
57  
58  
59  
60

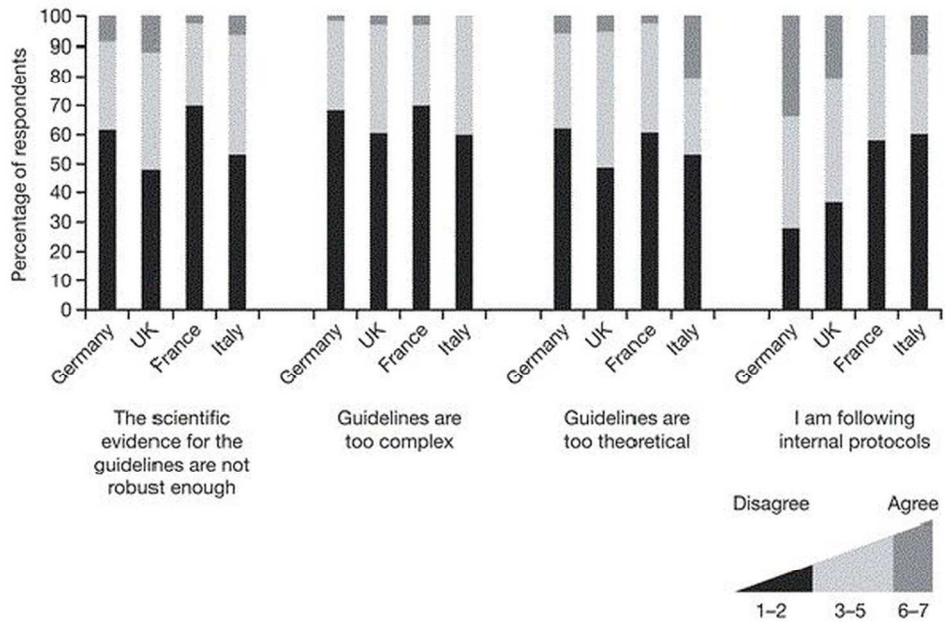

131x90mm (300 x 300 DPI)

view only

**Table S1.** Current practice for parenteral nutrition in NICU patients by type of hospital (University/teaching hospital vs. other hospital types)

| Nutrient               | TOTAL    | University/teaching hospital | Other hospital types |
|------------------------|----------|------------------------------|----------------------|
|                        | n (%)    | n (%)                        | n (%)                |
| Amino acids            |          |                              |                      |
| Initiation (p=0.069)   |          |                              |                      |
| D0                     | 101 (63) | 71 (67)                      | 30 (55)              |
| D1                     | 51 (32)  | 32 (30)                      | 19 (35)              |
| D2 or later            | 9 (6)    | 3 (3)                        | 6 (11)               |
| Initial dose (p=0.656) |          |                              |                      |
| 0.5 g/kg/d             | 44 (27)  | 28 (26)                      | 16 (29)              |
| 1.0 g/kg/d             | 53 (33)  | 34 (32)                      | 19 (35)              |
| 1.5 g/kg/d             | 34 (21)  | 23 (22)                      | 11 (20)              |
| 2 g/kg/d or higher     | 27 (17)  | 20 (19)                      | 7 (13)               |
| Do not know            | 3 (2)    | 1 (1)                        | 2 (4)                |
| Target dose (p=0.213)  |          |                              |                      |
| 1 or 2 g/kg/d          | 11 (7)   | 7 (7)                        | 4 (7)                |
| 3 or 4 g/kg/d          | 146 (91) | 98 (93)                      | 48 (87)              |

|                                  |         |         |         |
|----------------------------------|---------|---------|---------|
| 5 g/kg/d or higher / Do not know | 4 (3)   | 1 (1)   | 3 (6)   |
| <hr/>                            |         |         |         |
| Glucose                          |         |         |         |
| Initial dose (p=0.022)           |         |         |         |
| 6 g/kg/d                         | 73 (45) | 42 (40) | 31 (56) |
| 7 g/kg/d                         | 41 (26) | 34 (32) | 7 (13)  |
| 8 g/kg/d                         | 28 (17) | 19 (18) | 9 (16)  |
| 9 g/kg/d or higher               | 17 (11) | 11 (10) | 6 (11)  |
| Do not know                      | 2 (1)   | 0 (0)   | 2 (4)   |
| Target dose (p=0.160)            |         |         |         |
| 15 g/kg/d                        | 68 (42) | 40 (38) | 28 (51) |
| 16 g/kg/d                        | 38 (24) | 29 (27) | 9 (16)  |
| 17 g/kg/d                        | 12 (8)  | 8 (8)   | 4 (7)   |
| 18 g/kg/d or higher              | 32 (20) | 24 (23) | 8 (15)  |
| Do not know                      | 11 (7)  | 5 (5)   | 6 (11)  |
| <hr/>                            |         |         |         |
| Lipids                           |         |         |         |
| Initiation (p=0.015)             |         |         |         |
| D0                               | 32 (20) | 24 (23) | 8 (15)  |

1  
2  
3  
4  
5  
6  
7  
8  
9  
10  
11  
12  
13  
14  
15  
16  
17  
18  
19  
20  
21  
22  
23  
24  
25  
26  
27  
28  
29  
30  
31  
32  
33  
34  
35  
36  
37  
38  
39  
40  
41  
42  
43  
44  
45  
46  
47  
48  
49

|                                  |          |         |         |
|----------------------------------|----------|---------|---------|
| D1                               | 77 (48)  | 54 (51) | 23 (42) |
| D2                               | 36 (22)  | 23 (22) | 13 (24) |
| D3 or later                      | 16 (10)  | 5 (5)   | 11 (20) |
| Do not know                      | 0 (0)    | 0 (0)   | 0 (0)   |
| Initial dose (p=0.126)           |          |         |         |
| 0.5 g/kg/d                       | 98 (61)  | 60 (57) | 38 (69) |
| 1.0 g/kg/d                       | 59 (37)  | 43 (41) | 16 (29) |
| 1.5 g/kg/d or higher             | 3 (2)    | 3 (3)   | 0 (0)   |
| Do not know                      | 1 (1)    | 0 (0)   | 1 (2)   |
| Target dose (p= 0.372)           |          |         |         |
| 1 or 2 g/kg/d                    | 34 (21)  | 19 (18) | 15 (27) |
| 3 or 4 g/kg/d                    | 123 (76) | 84 (79) | 39 (71) |
| 5 g/kg/d or higher / Do not know | 4 (3)    | 3 (3)   | 1 (2)   |
| Caloric target (p=0.155)         |          |         |         |
| 90 or 100 kcal/kg/d              | 29 (18)  | 14 (13) | 15 (27) |
| 110 kcal/kg/d                    | 28 (17)  | 20 (19) | 8 (15)  |
| 120 kcal/kg/d                    | 65 (40)  | 44 (42) | 21 (38) |

|                                             |         |         |         |
|---------------------------------------------|---------|---------|---------|
| 130 or more                                 | 35 (22) | 24 (23) | 11 (20) |
| Do not know                                 | 4 (3)   | 4 (4)   | 0 (0)   |
| Maximal caloric intake prescribed (p=0.008) |         |         |         |
| 110 kcal/kg/d                               | 13 (8)  | 11 (10) | 2 (4)   |
| 120 kcal/kg/d                               | 36 (22) | 22 (21) | 14 (26) |
| 130 kcal/kg/d                               | 32 (20) | 14 (13) | 18 (33) |
| 140 kcal/kg/d                               | 37 (23) | 28 (26) | 9 (16)  |
| 150 kcal/kg/d or more                       | 34 (21) | 22 (21) | 12 (22) |
| Do not know                                 | 9 (6)   | 9 (9)   | 0 (0)   |

(Percentages do not necessarily sum up to 100% due to rounding)



**Table S2.** Current practice for parenteral nutrition in NICU patients by number of admissions per year of infants with a birth weight  $\leq 1500$ g.

| Nutrient               | TOTAL    | Number of admissions |          |            |
|------------------------|----------|----------------------|----------|------------|
|                        |          | 0 - 65               | 66 - 111 | $\geq 112$ |
|                        |          | n (%)                | n (%)    | n (%)      |
| Amino acids            |          |                      |          |            |
| Initiation (p=0.262)   |          |                      |          |            |
| D0                     | 101 (63) | 24 (52)              | 43 (69)  | 34 (64)    |
| D1                     | 51 (32)  | 17 (37)              | 17 (27)  | 17 (32)    |
| D2 or later            | 9 (6)    | 5 (11)               | 2 (3)    | 2 (4)      |
| Initial dose (p=0.611) |          |                      |          |            |
| 0.5 g/kg/d             | 44 (27)  | 17 (37)              | 15 (24)  | 12 (23)    |
| 1.0 g/kg/d             | 53 (33)  | 16 (35)              | 19 (31)  | 18 (34)    |
| 1.5 g/kg/d             | 34 (21)  | 8 (17)               | 14 (23)  | 12 (23)    |
| 2 g/kg/d or higher     | 27 (17)  | 5 (11)               | 13 (21)  | 9 (17)     |
| Do not know            | 3 (2)    | 0 (0)                | 1 (2)    | 2 (4)      |
| Target dose (p=0.343)  |          |                      |          |            |

|                                  |          |         |         |         |
|----------------------------------|----------|---------|---------|---------|
| 1 or 2 g/kg/d                    | 11 (7)   | 6 (13)  | 3 (5)   | 2 (4)   |
| 3 or 4 g/kg/d                    | 146 (91) | 39 (85) | 58 (94) | 49 (93) |
| 5 g/kg/d or higher / Do not know | 4 (3)    | 1 (2)   | 1 (2)   | 2 (4)   |

---

 Glucose

## Initial dose (p=0.504)

|                    |         |         |         |         |
|--------------------|---------|---------|---------|---------|
| 6 g/kg/d           | 73 (45) | 26 (57) | 23 (37) | 24 (45) |
| 7 g/kg/d           | 41 (26) | 8 (17)  | 21 (34) | 12 (23) |
| 8 g/kg/d           | 28 (17) | 6 (13)  | 11 (18) | 11 (21) |
| 9 g/kg/d or higher | 17 (11) | 6 (13)  | 6 (10)  | 5 (9)   |
| Do not know        | 2 (1)   | 0 (0)   | 1 (2)   | 1 (2)   |

## Target dose (p=0.320)

|                     |          |         |         |         |
|---------------------|----------|---------|---------|---------|
| 15 g/kg/d           | 68 (42)  | 24 (52) | 24 (39) | 20 (38) |
| 16 g/kg/d           | 38 (24)  | 9 (20)  | 14 (23) | 15 (28) |
| 17 g/kg/d           | 12 (8)   | 6 (13)  | 4 (7)   | 2 (4)   |
| 18 g/kg/d or higher | 32 (20)  | 5 (11)  | 14 (23) | 13 (25) |
| Do not know         | 11 (6.8) | 2 (4.3) | 6 (9.7) | 3 (5.7) |

---

 Lipids

|    |                                  |          |         |         |         |
|----|----------------------------------|----------|---------|---------|---------|
| 1  |                                  |          |         |         |         |
| 2  |                                  |          |         |         |         |
| 3  |                                  |          |         |         |         |
| 4  |                                  |          |         |         |         |
| 5  | Initiation (p=0.011)             |          |         |         |         |
| 6  |                                  |          |         |         |         |
| 7  | D0                               | 32 (20)  | 10 (22) | 16 (26) | 6 (11)  |
| 8  |                                  |          |         |         |         |
| 9  | D1                               | 77 (48)  | 16 (35) | 31 (50) | 30 (57) |
| 10 |                                  |          |         |         |         |
| 11 | D2                               | 36 (22)  | 11 (24) | 9 (15)  | 16 (30) |
| 12 |                                  |          |         |         |         |
| 13 | D3 or later                      | 16 (10)  | 9 (20)  | 6 (10)  | 1 (2)   |
| 14 |                                  |          |         |         |         |
| 15 | Do not know                      | 0 (0)    | 0 (0)   | 0 (0)   | 0 (0)   |
| 16 |                                  |          |         |         |         |
| 17 | Initial dose (p=0.246)           |          |         |         |         |
| 18 |                                  |          |         |         |         |
| 19 | 0.5 g/kg/d                       | 98 (61)  | 31 (67) | 37 (60) | 30 (57) |
| 20 |                                  |          |         |         |         |
| 21 | 1.0 g/kg/d                       | 59 (37)  | 15 (33) | 22 (36) | 22 (42) |
| 22 |                                  |          |         |         |         |
| 23 | 1.5 g/kg/d or higher             | 3 (2)    | 0 (0)   | 3 (5)   | 0 (0)   |
| 24 |                                  |          |         |         |         |
| 25 | Do not know                      | 1 (1)    | 0 (0)   | 0 (0)   | 1 (2)   |
| 26 |                                  |          |         |         |         |
| 27 | Target dose (p= 0.224)           |          |         |         |         |
| 28 |                                  |          |         |         |         |
| 29 | 1 or 2 g/kg/d                    | 34 (21)  | 15 (33) | 10 (16) | 9 (17)  |
| 30 |                                  |          |         |         |         |
| 31 | 3 or 4 g/kg/d                    | 123 (76) | 30 (65) | 51 (82) | 42 (79) |
| 32 |                                  |          |         |         |         |
| 33 | 5 g/kg/d or higher / Do not know | 4 (3)    | 1 (2)   | 1 (2)   | 2 (4)   |
| 34 |                                  |          |         |         |         |
| 35 |                                  |          |         |         |         |
| 36 | Caloric target (p=0.107)         |          |         |         |         |
| 37 |                                  |          |         |         |         |
| 38 | 90 or 100 kcal/kg/d              | 29 (18)  | 12 (26) | 6 (10)  | 11 (21) |
| 39 |                                  |          |         |         |         |
| 40 |                                  |          |         |         |         |
| 41 |                                  |          |         |         |         |
| 42 |                                  |          |         |         |         |
| 43 |                                  |          |         |         |         |
| 44 |                                  |          |         |         |         |
| 45 |                                  |          |         |         |         |
| 46 |                                  |          |         |         |         |
| 47 |                                  |          |         |         |         |
| 48 |                                  |          |         |         |         |
| 49 |                                  |          |         |         |         |

|                                             |         |         |         |         |
|---------------------------------------------|---------|---------|---------|---------|
| 110 kcal/kg/d                               | 28 (17) | 11 (24) | 7 (11)  | 10 (19) |
| 120 kcal/kg/d                               | 65 (40) | 13 (28) | 32 (52) | 20 (38) |
| 130 or more                                 | 35 (22) | 10 (22) | 14 (23) | 11 (21) |
| Do not know                                 | 4 (3)   | 0 (0)   | 3 (5)   | 1 (2)   |
| Maximal caloric intake prescribed (p=0.199) |         |         |         |         |
| 110 kcal/kg/d                               | 13 (8)  | 5 (11)  | 3 (5)   | 5 (10)  |
| 120 kcal/kg/d                               | 36 (22) | 10 (22) | 10 (16) | 16 (30) |
| 130 kcal/kg/d                               | 32 (20) | 12 (26) | 11 (18) | 9 (17)  |
| 140 kcal/kg/d                               | 37 (23) | 7 (15)  | 19 (31) | 11 (21) |
| 150 kcal/kg/d or more                       | 34 (21) | 12 (26) | 13 (21) | 9 (17)  |
| Do not know                                 | 9 (6)   | 0 (0)   | 6 (10)  | 3 (6)   |

(Percentages do not necessarily sum up to 100% due to rounding)

**Table S3:** Questions of the survey questionnaire used for this report

**Q1. Function:**

- [1] Consultant
- [2] Higher Specialist Trainee
- [3] Specialist Registrar
- [4] Other: \_\_\_\_\_

**Q2. Years of practice:**

- [1] less than 1 year
- [2] 1 to less than 3 years
- [3] 3 to less than 5 years
- [4] 5 to less than 7 years
- [5] 7 to less than 10 years
- [6] 10 years and more

**Q3. Type of hospital:**

- [1] University / teaching hospital
- [2] General hospital
- [3] Specialist hospital
- [4] Private hospital

For the questions below, if you do not have the exact numbers readily available, please provide your best estimates.

**Q4. How many beds are there in your neonatal intensive care unit?**

- ..... # highest acuity beds
- ..... # intermediate care beds

**Q5. What is the average number of admissions to your neonatal intensive care unit per year, by birth weight?**

- ..... # <1000g
- ..... # 1001-1500g
- ..... # 1501g-2500g
- ..... # >2500g

Parenteral nutrition in this survey refers to intravenous nutrition given via a central or peripheral line. Along with fluids and micronutrients, it contains macronutrients such as amino acids/protein, glucose and lipids. In all of the questions of this survey, please consider only the neonatal intensive care patients that you see as in-patients in the hospital.

**Objective 1:** to understand the current treatment practices associated with neonatal Parenteral Nutrition; for example: nutritional objectives (target values); initiation of PN (first day of administration of AA, lipids, etc.)

Important definition: in this survey D0 stands for the first day of life.

**Q6. Amino acid provision – please chose the respective values, which best describe your current, standard practice:**

|                                            |     |     |     |    |     |             |             |
|--------------------------------------------|-----|-----|-----|----|-----|-------------|-------------|
| When do you start amino acids?             | D0  | D1  | D2  | D3 | D4  | D5 or later | Do not know |
| What is your starting dose? (g/kg/day)     | 0,5 | 1,0 | 1,5 | 2  | 2,5 | >2,5        | Do not know |
| What is your usual target dose? (g/kg/day) | 1   | 2   | 3   | 4  | 5   | >5          | Do not know |

**Q7. Glucose treatment – please chose the respective categories, which best describe your current, usual practices:**

|                                            |    |    |    |    |    |     |             |
|--------------------------------------------|----|----|----|----|----|-----|-------------|
| Which is your starting dose? (g/kg/day)    | 6  | 7  | 8  | 9  | 10 | >10 | Do not know |
| What is your usual target dose? (g/kg/day) | 15 | 16 | 17 | 18 | 19 | >19 | Do not know |

**Q8. Lipid treatment – please chose the respective categories, which best describe your current, usual practices:**

|                                            |     |    |     |    |             |             |             |
|--------------------------------------------|-----|----|-----|----|-------------|-------------|-------------|
| When do you start lipid?                   | D0  | D1 | D2  | D3 | D4 or later | D5 or later | Do not know |
| Which is your starting dose? (g/kg/day)    | 0,5 | 1  | 1,5 | 2  | 2,5         | >2,5        | Do not know |
| What is your usual target dose? (g/kg/day) | 1   | 2  | 3   | 4  | 5           | >5          | Do not know |

**Q9. Caloric targets – please chose the respective categories, which best describe your current, usual practices:**

|                                                                       |     |     |     |     |     |      |             |
|-----------------------------------------------------------------------|-----|-----|-----|-----|-----|------|-------------|
| What is your usual caloric target? (kCal/kg/day)                      | 90  | 100 | 110 | 120 | 130 | >130 | Do not know |
| What is the maximum caloric intake normally prescribed? (kCal/kg/day) | 110 | 120 | 130 | 140 | 150 | >150 | Do not know |

**Objective 2:** To learn about the acceptance and utilisation of local and international guideline recommendations, specifically

- awareness about local and international guidelines
- level of acceptance of the recommendations
- implementation of the recommendations - role of the guidelines
- objections and obstacles hindering the use of guidelines

**Q10. Are you aware of guidelines for use of neonatal / pediatric parenteral nutrition?**

[1] Yes

[2] No

Ask only, if "1" in Q10 selected

**Q11. Which local and international guidelines for the use of parenteral nutrition in neonatal / pediatric patients are you aware of?** Please list the type of guideline and the name of the scientific society or authority who published or issued it.

.....

Ask only, if "1" in Q10 selected

**Q12. To what extent do you agree or disagree with the following statements?** (Please indicate your answer on a scale of 1 to 7 where 1 means "do not agree at all" and 7 means "fully agree")

|                                                                                                                              | do not agree at all |   |   |   | fully agree |   |   |
|------------------------------------------------------------------------------------------------------------------------------|---------------------|---|---|---|-------------|---|---|
| I agree with most of the recommendations given in the guidelines for parenteral nutrition in pediatric patients.             | 1                   | 2 | 3 | 4 | 5           | 6 | 7 |
| I obtain a copy, read and follow guidelines for parenteral nutrition in pediatric patients as soon as they become available. | 1                   | 2 | 3 | 4 | 5           | 6 | 7 |
| The scientific evidence that guidelines are based on, are not robust enough to be convincing and to follow them              | 1                   | 2 | 3 | 4 | 5           | 6 | 7 |

Ask only, if "1" in Q10 selected

**Q13. What might prevent you from following guidelines for parenteral nutrition in pediatric patients?** (Please indicate your answer on a scale of 1 to 7, where 1 means "do not agree at all" and 7 means "fully agree")

|                                                                                                        | do not agree at all |   |   |   | fully agree |   |   |
|--------------------------------------------------------------------------------------------------------|---------------------|---|---|---|-------------|---|---|
| Guidelines are too complex                                                                             | 1                   | 2 | 3 | 4 | 5           | 6 | 7 |
| Guidelines are too theoretical                                                                         | 1                   | 2 | 3 | 4 | 5           | 6 | 7 |
| I am following our internal protocols, which are not always aligned with the guideline recommendations | 1                   | 2 | 3 | 4 | 5           | 6 | 7 |

1  
2  
3  
4  
5  
6  
7 **Quality of newborn care: Adherence to guidelines for parenteral nutrition in preterm**  
8 **infants in Four European Countries**  
9

10  
11 **Address correspondence to:**

12 Professor Alexandre Lapillonne, Department of Neonatology, APHP Necker-Enfants Malades  
13 hospital, 149 Boulevard Sevres, 75014 Paris, France,  
14

15 Mail: [alexandre.lapillonne@nck.aphp.fr](mailto:alexandre.lapillonne@nck.aphp.fr); tel: +33 (1) 71396542  
16

17  
18 **Authors:** Alexandre Lapillonne<sup>a,b</sup>, MD, PhD, Virgilio Paolo Carnielli<sup>c</sup>, MD, PhD, Nicholas David  
19 Embleton<sup>d</sup>, MBBS, MD, Walter Mihatsch<sup>e</sup>, MD  
20

21  
22 **Author affiliations:**

23 <sup>a</sup>Paris Descartes University, APHP Necker hospital, Paris France; <sup>b</sup>CNRC, Baylor College of Medicine,  
24 Houston, TX, USA; <sup>c</sup>Division of Neonatology, Department of Clinical Sciences, Polytechnic University  
25 of Marche and Salesi's Children Hospital, Azienda Ospedaliero Universitaria Ospedali Riuniti, Ancona,  
26 Italy; <sup>d</sup>Newcastle Neonatal Service, Newcastle upon Tyne Hospitals NHS Foundation Trust, Newcastle  
27 upon Tyne, United Kingdom; <sup>e</sup>Pediatric Clinic Harlaching, Munich, Germany  
28  
29  
30  
31

32 **Running title:** Adherence to guidelines for parenteral nutrition in preterm infants

33 **Key Words:** infant, premature, nutrition survey, feeding methods, parenteral nutrition, guideline  
34  
35  
36  
37

38 **Word count (text)** = ~~2383~~2822

Formatted: Not Highlight

39 **Word count (Abstract)** = ~~299~~295

40 **Number of references** = 21

41 **Number of figures** = ~~32~~

Formatted: Not Highlight

42 **Number of tables** = ~~43~~  
43  
44  
45  
46  
47  
48  
49  
50  
51  
52  
53  
54  
55  
56  
57  
58  
59  
60



**ARTICLE SUMMARY –****'Article focus':**

- Optimal nutritional care is critical for neonatal intensive care unit patients and associated with improved outcomes in later life.
- Clinical practice guidelines for parenteral nutrition exist, however, current clinical practice in Europe and compliance with these recommendations is unknown.
- The main objective was to assess the adherence to guidelines for parenteral nutrition in preterm infants in ~~f~~Four European Countries.

**'Key messages'**

- The initiation of PN is ~~still~~ frequently not compliant with current recommendations, with the main differences observed during the first days of life.
- There is an urgent need to improve dissemination of guidelines and to facilitate translation of knowledge into clinical practice.
- Web-based standard reporting systems that determine the actual compliance of in-house protocols with guidelines should be developed in parallel to determine to what extent new guidelines are translated into clinical practice.

**'Strengths and limitations of this study' section.****Strengths:**

- Nutrition for preterm infants is a hot topic in the field of neonatology.
- Large survey in 4 European countries that included 74% of the units of the 4 countries
- Surveys reflect one of the first steps of the dissemination of guidelines and, thus, provides insight on compliance to guidelines

**Limitations**

- Surveys reflect the intention to treat of the personnel from the NICU that respond to the survey, and may not reflect the actual clinical practice within the unit

**ABSTRACT**

**Objective:** Level of adherence to guidelines ~~is often not known and~~ should be explored particularly in preterm infants for which poor nutrition has major effects on outcomes in later life. The ~~main~~ objective was to evaluate compliance to international guidelines for parenteral nutrition (PN) in preterm infants across Neonatal intensive care units (NICUs) of four European countries.

**Design:** Clinical practice survey by the mean of a questionnaire addressing routine PN protocols, awareness and implementation of guidelines.

**Setting:** NICUs in the United Kingdom, Italy, Germany and France.

**Participants:** One senior physician per unit; 199 units which represent 74% of the NICUs of the 4 countries.

**Primary outcome measure:** Adherence of unit protocol to international guidelines; **Secondary outcome measure:** Factors that influence adherence to guidelines.

**Results:** ~~Eighty percent~~80% of the respondents stated that they were aware of some PN clinical practice guidelines. For amino acid infusion (AA), 63% of the respondents aim to initiate AA on ~~D0D0~~, 38% aim to administer an initial dose ~~of~~  $\geq 1.5$  g/kg/d ~~to prevent a negative balance~~ and 91% aim for a target dose ~~for AA~~ of 3 or 4 g/kg/d, as recommended. For parenteral lipids~~lipid administration~~, 90% of the respondents aim to initiate parenteral lipids them during the first 3 days of life, 39% aim to use an initial dose  $\geq 1.0$  g/kg/d, and 76% define the target dose ~~for lipids~~ as 3 to 4 g/kg/d, as recommended. Significant variations in PN protocols were observed among countries but the type of hospital or the number of admissions per year had only a marginal impact on the PN protocols.

**Conclusions:** Most respondents indicate that their clinical practice was based on common guidelines. However, the initiation of PN is frequently not compliant with current recommendations, with the main differences observed during the first days of life. Clinicians initiate PN earlier than in the past but the initiation of PN is still frequently not compliant with international guidelines. Continuous education focusing on parenteral nutrition practice is needed, and greater efforts are required to disseminate and implement international guidelines.

1  
2  
3  
4  
5  
6  
7  
8  
9  
10  
11  
12  
13  
14  
15  
16  
17  
18  
19  
20  
21  
22  
23  
24  
25  
26  
27  
28  
29  
30  
31  
32  
33  
34  
35  
36  
37  
38  
39  
40  
41  
42  
43  
44  
45  
46  
47  
48  
49  
50  
51  
52  
53  
54  
55  
56  
57  
58  
59  
60

**Abbreviations:**

AA – amino acids; DO – ~~the first~~ day of ifebirth; ELBW – extremely low birth weight;  
EN – enteral nutrition; NICU – neonatal intensive care unit; PN – parenteral nutrition;  
UK – United Kingdom; US – United States of America; VLBW – very low birth weight

For peer review only

## INTRODUCTION

Poor nutrition in preterm infants has major effects on outcomes in later life, including physical growth, intellectual development and, possibly, cardiovascular and metabolic effects.[1, 2] The quality and quantity of daily nutritional intake is critical particularly during the first weeks of life since amino acid, energy and lipid intake from parenteral nutrition have been shown to be associated with later development.[3, 4] Reports from neonatal intensive care units (NICUs) worldwide have shown that nutritional intake in preterm infants is inadequate.[5, 6] The causes of this inadequate intake, particularly in the early neonatal phase, may be multifactorial and partly iatrogenic. It may depend not only on the infant's metabolic capacities, but also on the availability and safety of the solutions used, the type of venous access, the department's usual practice, and the prescriber's knowledge of the infant's nutritional needs.[7]

Clinical practice guidelines for the nutritional needs of preterm infants have been regularly revised over recent decades, leading to the development of the most recent international guidelines on pediatric parenteral nutrition (PN) in Europe from the European Society of Paediatric Gastroenterology, Hepatology and Nutrition (ESPGHAN) and the European Society for Clinical Nutrition and Metabolism (ESPEN) in 2005 [8], and globally in the book entitled "Nutritional needs of the preterm infant: Scientific basis and practical guidelines" also published in 2005.[9] (Table 1) Previous studies, especially those performed before current clinical practice guidelines were available, demonstrated large differences in both the nutritional protocols applied in clinical practice and the resulting clinical outcomes.[6, 10, 11] A recent systematic review showed that large differences are observed in the nutritional protocols both among the NICUs in the individual surveys and among surveys.[12]

Level of adherence to guidelines is often not known and it remains unclear to what extent recommendations for early parenteral nutrition in NICU patients have been translated into routine clinical care in Europe. Therefore, we performed a clinical practice survey among NICU physicians in

1  
2  
3  
4  
5  
6  
7 four European countries to evaluate compliance to international guidelines for parenteral nutrition  
8 (PN) in preterm infants and to determine factors that influence compliance to guidelines.  
9

## 10 11 12 **METHODS**

13  
14 The survey questionnaire was developed under the lead of AL together with the coauthors. ~~The~~  
15 ~~survey was implemented in a web-based format by an independent company (GfK SE Division~~  
16 ~~HealthCare, Nürnberg, Germany).~~ The survey was conducted ~~in a blinded manner~~ between  
17  
18 October 2009 and April 2010 among NICU physicians in Germany, the United Kingdom (UK), France  
19  
20 and Italy in order to survey ~50 units per country. One author from each country provided a list of  
21  
22 the largest NICUs using available data and their own knowledge of national and regional units, with  
23  
24 at least one senior physician's name per unit. NICUs were selected for the study if they had high  
25  
26 acuity ~~or~~ intensive care beds, and >5 infants per week requiring parenteral nutrition. The senior  
27  
28 physician from each NICU was contacted and asked to complete the survey questionnaire or  
29  
30 delegate the task to a colleague devoting ≥20% of their time to patient care and with >3 years of  
31  
32 clinical experience in neonatal intensive care. Where a response was not obtained other physicians  
33  
34 from the same unit were approached, if available. The identity of the physicians contacted and  
35  
36 requested to complete the survey remained blinded for the analysis and to all authors.  
37

38  
39 The survey questionnaire was developed in English and translated into German, French and Italian  
40  
41 for use in the national language of each country. For the purpose of the survey, PN was defined as  
42  
43 intravenous nutrition given via a central or peripheral line and containing fluids and any macro- or  
44  
45 micronutrients. Respondents were instructed to consider only in-hospital neonatal intensive care  
46  
47 patients. D0 was defined as the first day of lifebirth, D1 for the subsequent 24 h, and D2 and D3 the  
48  
49 following days. The survey comprised sections to characterize the profile of the NICU, and routine  
50  
51 clinical practice with respect to PN ~~between D0 and D3~~. The survey assessed the logistical  
52  
53 organization of PN within the hospital, the types of PN available and prescribed, and some of the  
54

reasons for use or non-use of standard formulations, preferred product characteristics and awareness and implementation of local and international clinical practice guidelines. Only the unit profile, the routine clinical practice with respect to PN, clinical practice parameters and awareness and implementation of guidelines were analyzed for this report.

The survey was implemented in a web-based format by an independent company (GfK SE Division HealthCare, Nürnberg, Germany). The authors and the sponsor were blinded with regard to the respondents' identities and with regard to the individual questionnaires. To best describe the macronutrient or energy provision, single choice questions were asked offering 6 possible answers, 5 with plausible intakes and one "do not know" response. To assess the extent of agreement with statements related to awareness and implementation of guidelines, questions were asked using a 7-point bipolar scale, 1 meant "do not agree at all" and 7 meant "fully agree".

Compliance to international guidelines for PN in preterm infants was made mainly by using the European ones since they have been published in a journal widely disseminated [8] and since they are also easily and freely accessible through the ESPEN website (<http://espen.anavaio.com/espencms/index.php/education/espen-guidelines>). NICUs were considered compliant to guidelines if: for amino acids, initiation = day of birth, initiation dose  $\geq 1.5$  g/kg/d, target dose = 3 to 4 g/kg/d; for glucose, initiation dose  $\geq 7$  g/kg/d, target dose = 10 to 17 g/kg/d; for lipids, initiation  $\leq$  day 3 of life, initiation dose  $\geq 1$  g/kg/d, target dose = 3 to 4 g/kg/d; energy, target dose = 110 to 120 kcal/kg/d.

#### Statistical analyses

Analyses were restricted to completed questionnaires with evaluable results. Data were split to cross tabs with respect to various grouping variables. Since infants with a birth weight below 1500g are those more likely receiving PN, splitting the data using this parameter was considered to better reflect the experience in prescribing PN than using the whole population of newborn admitted in a NICU. Therefore, first class split variables consisted of tertiles or quartiles, which were computed on

Formatted: Indent: Left: 0", First line: 0"

Formatted: English (U.S.)

Formatted: Font: Calibri, English (U.S.)

Formatted: Font: (Default) Calibri, English (U.S.)

Formatted: Font: (Default) Calibri, English (U.S.)

Formatted: Font: Italic

the average number of admissions to the neonatal intensive care unit per year by birth weight up to 1500 g. The second class of grouping factors comprised categorical variables such as hospital type or country. The goal was to examine the null hypothesis "No pairwise differences in proportions across subgroups". Null hypotheses were tested using  $\chi^2$ -tests and rejected at the 5% error level.

#### *Ethics*

This study was conducted according to the guidelines in the Declaration of Helsinki. Since this study did not involve human subjects/patients or handling of medical records, ethical approval was not required.

Formatted: Font: Italic

Formatted: English (U.S.)

Formatted: English (U.S.)

Formatted: English (U.S.)

Formatted: Font: Not Italic

Formatted: English (U.S.)

## RESULTS

### Profile of the NICUs surveyed

A total of 199 NICUs were surveyed (45 from the UK, 55 from Germany, 49 from France and 50 from Italy) and their characteristics are presented in table 2. Overall, we surveyed 74% of the units of the 4 countries: 45/64 (70%) in the UK; 55/78 (71%) in Germany; 49/66 (74%) in France; 50/60 (83%) in Italy). One hundred sixty one of the 199 (81%) surveys were included in the analysis as 38 surveys were excluded due to invalid responses. The majority of invalid surveys came from units with less the lower number of than 4 beds of high acuity care beds (i.e., 50% of them had  $\leq 5$  high acuity care beds vs. 12%;  $p < 0.001$ ). The number of years of practice in neonatology of the physicians who completed the survey questionnaire was more than 10 years for 141 of them (71%), 5 to 9 years for 40 of them (20%), 3 to 5 years for 17 of them (8.5%) and 1 to 3 years for 1 of them (0.5%).

### Adherence of unit protocol to international guidelines

Survey respondents were requested to provide information on the timing and composition of PN summarized in table 3. Level of adherence of unit protocols to international guidelines was highly variable and varied according to the type of macronutrient (Figure 1). With regards to initiation of PN, amino acids were often initiated late, and both lipids and amino acids were initiated at a lower

Formatted: Normal

1  
2  
3  
4  
5  
6  
7 dose than recommended (Figure 1). With regards to full parenteral nutrition (i.e., target dose), most  
8 NICUs reported an adequate target dose for amino acids, lipids and glucose. In contrast, only half of  
9 the units reported a target energy intake compliant with guidelines; ~20% reported a lower higher  
10 target than recommended and a similar percentage a higher target than recommended.

#### 14 **Awareness of nutritional guidelines**

15 Eighty percent of physicians across all countries reported an awareness of nutritional guidelines, but  
16 less than 50% gave a source or specification (Table 3). There were inter country differences for  
17 physicians reporting an awareness of clinical practice guidelines for neonatal or pediatric PN (Table  
18 2). Respondents indicated that they agreed with most of the recommendations, with 66% and 70%  
19 of physicians from Germany and France and 46% and 53% in UK and Italy in strong agreement  
20 (Figure 1). Overall, the physicians agreed less strongly with the statement "I obtain a copy, read and  
21 follow guidelines for parenteral nutrition in pediatric patients as soon as they become available"  
22 (Figure 1). When asked whether the lack of robust evidence on which the guidelines are based  
23 presented a barrier to implementation, 3% and 7% of the physicians from France and Italy agreed, in  
24 comparison to 9% and 12% of the respondents from Germany and the UK (Figure 2). About 60-70%  
25 of the physicians did not find current guidelines too complex and those from both the UK and Italy  
26 more often found the guidelines to be too theoretical to be used in clinical practice than  
27 respondents from Germany or France. Respondents from Germany were most likely to report relying  
28 on internal clinical practice protocols (Figure 2).

#### 42 **Adherence of unit protocol to international guidelines**

43 Survey respondents were requested to provide information on the timing and composition of PN as  
44 summarized in table 4. With regards to initiation of PN, amino acids are initiated by 63% of the  
45 responding units on the first day of life (D0) and by 32% on D1. Amino acids were reported to be  
46 started at a dose of 1.0 g/kg/d or less by 60% overall. Glucose was administered at a starting dose of  
47 6 or 7 g/kg/d by 71% of the NICUs surveyed. Lipid emulsions were initiated by 20% of the units on D0  
48 and by an additional 48% on D1. Initial lipid dose was reported to be 0.5 or 1.0 g/kg/d by 98% of  
49  
50  
51  
52  
53  
54



respondents. With regards to full parenteral nutrition, most NICUs (91%) reported a target dose for amino acids of 3 or 4 g/kg/d. Overall, 66% of the units administered a target dose of glucose of 15 or 16 g/kg/d, and 76% of the units administered a target dose of lipids of 3 or 4 g/kg/d.

#### Factors that influence adherence to guidelines

##### *Country, hospital type and size of unit.*

There was a significant effect of countries on ~~parenteral nutrition~~PN practices (Table 34). ~~The patterns observed were the following: with regards to early PN, amino acids were started sooner and at a higher dose in France than in the other countries. A similar trend was seen for lipids in the UK where the starting dose of glucose was also higher than in the other countries. With regards to full PN (i.e., target dose), amino acid target dose was more likely within the recommendations in France than in other countries whereas glucose target dose was more likely within the recommendations in the UK and in Italy. The distribution for caloric target was wide; the units in France and Germany were more likely prescribing higher energy intake than recommended whereas lower energy intake was more likely seen in the UK and Italy.~~

When the PN results were stratified by hospital type, no differences were observed in the initiation, starting or target dose of amino acids (Data not shown). University or teaching hospitals reported higher starting doses of glucose than other types of hospital (40% vs. 56% at 6 g/kg/d and 32% vs. 13% at 7 g/kg/d;  $p=0.022$ ), but there was no significant difference in the target dose between the two types of institution. University or teaching hospitals also reported ~~ed~~ initiation of lipid feeding earlier than other institutions (initiation on D3 or later 5% vs. 20%;  $p=0.015$ ), but with no significant difference in starting or target dose. The caloric targets between the two types of hospital were similar, but the normal maximal caloric intake prescribed were significantly different ( $p=0.008$ ).

When the data were stratified by the number of admissions, the only category in which a significant difference was apparent was the day on which lipid feeding was initiated. Units with lower admissions rates were more likely to report initiation on D3 or later ( $p=0.011$ ) (Data not shown).

Formatted: Font: Italic

Formatted: Not Highlight

Formatted: Not Highlight

Formatted: Not Highlight

Formatted: Highlight

### Awareness of nutritional guidelines

Eighty percent of physicians across all countries reported an awareness of nutritional guidelines, but less than 50% gave a source or specification (Table 4). There were inter-country differences for physicians reporting an awareness of clinical practice guidelines for neonatal or pediatric PN (Table 4). There was no significant association between being aware of guidelines for use of neonatal / pediatric PN and being compliant with international guidelines, but there was a trend for an association between being aware of guidelines and being compliant for the lipid target dose ( $p=0.054$ ) and for the initiation of amino acids ( $p=0.070$ ).

Respondents indicated that they agreed with most of the recommendations, with 66% and 70% of physicians from Germany and France and 46% and 53% in UK and Italy in strong agreement (Figure 2). Overall, the physicians agreed less strongly with the statement "I obtain a copy, read and follow guidelines for parenteral nutrition in pediatric patients as soon as they become available" (Figure 2). When asked whether the lack of robust evidence on which the guidelines are based presented a barrier to implementation, 3% and 7% of the physicians from France and Italy agreed, in comparison to 9% and 12% of the respondents from Germany and the UK (Figure 3). About 60-70% of the physicians did not find current guidelines too complex and those from both the UK and Italy more often found the guidelines to be too theoretical to be used in clinical practice than respondents from Germany or France. Respondents from Germany were most likely to report relying on internal clinical practice protocols (Figure 3).

## DISCUSSION

This study represents the first survey of neonatal PN clinical practice behavior undertaken at the European level. This type of survey emphasizes how current practices differ from recommended guidelines and encourage clinicians to be aware of the potential for improvement. Since the objective of the study was to compare the data with international guidelines (~~table 4~~) we did not

Formatted: Font: Not Bold, Italic

Formatted: Font: Not Bold

Formatted: Not Highlight

Formatted: Not Highlight

Formatted: Not Highlight

1  
2  
3  
4  
5  
6  
7 report and/or use local guidelines, if any, and for consistency, we mainly used for comparison the  
8 European guidelines which are widely available [through both a publication widely referenced \[8\] and](#)  
9 [a website.\[8\]](#)

10  
11  
12 Despite demonstrating apparent improvement in PN practices, the results presented here shows  
13  
14 that 37% of neonatal units in [the 4 European countries surveyed](#) initiate amino acid feeding on D1  
15 or later and not on D0 as recommended.[8] Moreover, 60% of the European respondents administer  
16 an initial dose of less than the required 1.5 g/kg/d to prevent a negative balance.[8] The apparent  
17 higher compliance with guideline recommendations to initiate amino acid infusion on D0 and a  
18 target dose of 3-4 g/kg/d in France may be attributable to a combination of commercially available  
19 binary standard solutions and/or awareness of a national survey on this topic and widely  
20 disseminated at the country level.[13]

21  
22  
23 Our study shows that whilst 90% of the NICUs surveyed provide early lipids, 21% of them provide a  
24 maximum dose lower than recommended. This is similar to other surveys suggesting that physicians  
25 do not comply easily with the guideline defining the optimal dose for parenteral lipids. Previous  
26 surveys have shown that the timing and dose of parenteral lipids vary between surveys to a scale  
27 which is larger than that for amino acids.[12] It was also found that there was a lack of consensus  
28 between surveys on the contraindications for lipids and/or indication for stopping lipids. This may  
29 reflect the lack of scientific data and absence of clear guidance on this topic.

30  
31  
32 Awareness of some guidelines was reported by the majority of physicians completing the survey,  
33 although 21% claimed not to be aware of any guidelines. This may be of relevance when the 40% of  
34 respondents who do not provide amino acids on the [first-day of life-of birth](#) are considered,  
35 highlighting a potential deficit in implementation of the guidelines. Limited access to standard  
36 solutions and specific country regulations on preparation may also be possible alternative  
37 explanations why guidelines have not been translated into clinical practice.

38  
39  
40 University/teaching hospitals provided a higher starting dose of glucose and initiated lipid and amino  
41 acid infusion earlier compared to other institutions. Similarly, late initiation of lipid infusion (D3 or  
42

1  
2  
3  
4  
5  
6  
7 later) was less common in NICUs with a highest number of admissions per year. While these results  
8 may suggest better adherence to treatment guidelines at hospitals with a high number of  
9 admissions, the existing data are unclear as to whether high numbers of admissions are also  
10 associated with lower rates of mortality or morbidity.[14, 15]  
11

12  
13  
14 The methodological limitations of using surveys for the assessment of nutritional protocols have  
15 been previously discussed in detail [13] and it should be reiterated that these surveys reflect the  
16 intention to treat of the personnel from the NICU that respond to the survey, and may not reflect  
17 the actual clinical practice within the unit. Nevertheless, intention to treat reflects one of the first  
18 steps of the dissemination of guidelines and, thus, provides insight on compliance to guidelines. The  
19 number of countries participating in our survey was limited to 4 for practical reasons and, therefore,  
20 the results obtained do not permit conclusions that apply to other European countries. The number  
21 of surveys received represents a substantial proportion of NICUs in each of the 4 countries; however,  
22 the number of invalid surveys indicates that there may have been some confusion with respect to  
23 terminology or intent. Interestingly, the invalid responses were mainly seen in the smaller units  
24 which are less likely to prescribe PN. ~~This is in line with the observation that larger units prescribe PN~~  
25 ~~that are more likely compliant with guidelines.~~  
26

27  
28  
29 Finally, our results allow comparison of current practices among countries but also historical  
30 comparison with similar surveys published earlier.[12] When compared to studies performed in the  
31 United States [16] or individual European countries [17-20], our study shows that PN in preterm  
32 neonates is provided earlier and in higher volumes than in the past, reflecting changing clinical  
33 practice in response to increased knowledge about parenteral feeding in neonates, even if the  
34 practices are still not perfectly in line with guidelines.  
35

36  
37  
38 In conclusion, most respondents indicated that their clinical practice was based on common  
39 guidelines. ~~They are initiating parenteral nutrition earlier and in larger volumes than in the past,~~  
40 ~~reflecting increased knowledge about best nutritional practices in very preterm neonates.~~ However,  
41 the initiation of PN in the 4 countries surveyed is ~~still~~ frequently not compliant with current  
42

1  
2  
3  
4  
5  
6  
7 recommendations, with the main differences observed during the first days of life. Our study shows  
8 that there is an urgent need to improve dissemination of guidelines and to facilitate translation of  
9 knowledge into clinical practice. Given the need for continuous monitoring, it would be of value for  
10 scientific societies (particularly those that publish guidelines) to develop web-based standard  
11 reporting systems that determine the actual compliance of in-house protocols with guidelines. In the  
12 case of the nutrition for preterm infants, a limited number of questions on access to PN and the  
13 dose of nutrients given would be sufficient to provide insight on the implementation of guidelines at  
14 a local level.  
15  
16  
17  
18  
19  
20  
21  
22  
23  
24  
25  
26  
27  
28  
29  
30  
31  
32  
33  
34  
35  
36  
37  
38  
39  
40  
41  
42  
43  
44  
45  
46  
47  
48  
49  
50  
51  
52  
53  
54  
55  
56  
57  
58  
59  
60

**ACKNOWLEDGEMENTS**

The authors thank Istvan Szabo, Ines Pereira da Silva Lopes and Michael Imeokparia from Baxter Healthcare (Glattpark, Switzerland) for their insightful contribution to the project. Editorial assistance was provided by Physicians World Europe GmbH (Mannheim, Germany), sponsored by Baxter Healthcare. The authors thank the Association pour la Recherche et la Formation En Neonatologie (ARFEN) for providing technical assistance. Special thanks go to all the physicians who have completed the questionnaire for their contribution.

**FUNDING SOURCE**

This study was sponsored by Baxter Healthcare (Glattpark, Switzerland) who provided support for the development and implementation of the survey, face-to-face meetings, and writing of manuscript. All authors have received an unrestricted institutional grant from Baxter Healthcare for coordinating the study in their own country.

**CONFLICT OF INTEREST STATEMENT:**

The authors have no conflicts of interest relevant to this article to disclose.

## REFERENCES

1. Isaacs EB, Gadian DG, Sabatini S, Chong WK, Quinn BT, Fischl BR, Lucas A: **The effect of early human diet on caudate volumes and IQ.** *Pediatr Res* 2008, **63**(3):308-314.
2. Lapillonne A, Griffin IJ: **Feeding preterm infants today for later metabolic and cardiovascular outcomes.** *J Pediatr* 2013, **162**(3 Suppl):S7-16.
3. dit Trolli SE, Kermorvant-Duchemin E, Huon C, Bremond-Gignac D, Lapillonne A: **Early lipid supply and neurological development at one year in very low birth weight (VLBW) preterm infants.** *Early Hum Dev* 2012, **88** Suppl 1:S25-29.
4. Stephens BE, Walden RV, Gargus RA, Tucker R, McKinley L, Mance M, Nye J, Vohr BR: **First-week protein and energy intakes are associated with 18-month developmental outcomes in extremely low birth weight infants.** *Pediatrics* 2009, **123**(5):1337-1343.
5. Martin CR, Brown YF, Ehrenkranz RA, O'Shea TM, Allred EN, Belfort MB, McCormick MC, Leviton A: **Nutritional practices and growth velocity in the first month of life in extremely premature infants.** *Pediatrics* 2009, **124**(2):649-657.
6. Olsen IE, Richardson DK, Schmid CH, Ausman LM, Dwyer JT: **Intersite differences in weight growth velocity of extremely premature infants.** *Pediatrics* 2002, **110**(6):1125-1132.
7. Corpeleijn WE, Vermeulen MJ, van den Akker CH, van Goudoever JB: **Feeding very-low-birth-weight infants: our aspirations versus the reality in practice.** *Ann Nutr Metab* 2011, **58** Suppl 1:20-29.
8. Koletzko B, Goulet O, Hunt J, Krohn K, Shamir R: **1. Guidelines on Paediatric Parenteral Nutrition of the European Society of Paediatric Gastroenterology, Hepatology and Nutrition (ESPGHAN) and the European Society for Clinical Nutrition and Metabolism (ESPEN), Supported by the European Society of Paediatric Research (ESPR).** *J Pediatr Gastroenterol Nutr* 2005, **41** Suppl 2:S1-87.
9. Tsang R, Uauy R, Koletzko B, Zlotkin SH: **Nutritional Needs of the Preterm Infant: Scientific Basis and Practical Guidelines.** Cincinnati, OH; 2005.
10. Blackwell MT, Eichenwald EC, McAlmon K, Petit K, Linton PT, McCormick MC, Richardson DK: **Interneonatal intensive care unit variation in growth rates and feeding practices in healthy moderately premature infants.** *J Perinatol* 2005, **25**(7):478-485.
11. Clark RH, Thomas P, Peabody J: **Extrauterine growth restriction remains a serious problem in prematurely born neonates.** *Pediatrics* 2003, **111**(5 Pt 1):986-990.
12. Lapillonne A, Kermorvant-Duchemin E: **Parenteral Nutrition for NICU Patients – A Systematic Review of Current Practice Surveys** *J Nutr* in press.
13. Lapillonne A, Fellous L, Mokthari M, Kermorvant-Duchemin E: **Parenteral nutrition objectives for very low birth weight infants: results of a national survey.** *J Pediatr Gastroenterol Nutr* 2009, **48**(5):618-626.
14. Phibbs CS, Baker LC, Caughey AB, Danielsen B, Schmitt SK, Phibbs RH: **Level and volume of neonatal intensive care and mortality in very-low-birth-weight infants.** *N Engl J Med* 2007, **356**(21):2165-2175.
15. Horbar JD, Badger GJ, Lewit EM, Rogowski J, Shiono PH: **Hospital and patient characteristics associated with variation in 28-day mortality rates for very low birth weight infants. Vermont Oxford Network.** *Pediatrics* 1997, **99**(2):149-156.

16. Hans DM, Pylipow M, Long JD, Thureen PJ, Georgieff MK: **Nutritional practices in the neonatal intensive care unit: analysis of a 2006 neonatal nutrition survey.** *Pediatrics* 2009, **123**(1):51-57.
17. Grover A, Khashu M, Mukherjee A, Kairamkonda V: **Iatrogenic malnutrition in neonatal intensive care units: urgent need to modify practice.** *JPEN Journal of parenteral and enteral nutrition* 2008, **32**(2):140-144.
18. Lapillonne A, Fellous L, Kermorvant-Duchemin E: **Use of parenteral lipid emulsions in French neonatal ICUs.** *Nutrition in clinical practice : official publication of the American Society for Parenteral and Enteral Nutrition* 2011, **26**(6):672-680.
19. Ahmed M, Irwin S, Tuthill DP: **Education and evidence are needed to improve neonatal parenteral nutrition practice.** *JPEN J Parenter Enteral Nutr* 2004, **28**(3):176-179.
20. Fleming P, Chong A, Woolhead E, Mc Dermott C, Clarke T: **A national survey of current practice in the management of very low and extremely low birth weight infants: is there a role for national guidelines?** *Irish medical journal* 2008, **101**(10):310-313.
21. Powers RW, Catov JM, Bodnar LM, Gallaher MJ, Lain KY, Roberts JM: **Evidence of endothelial dysfunction in preeclampsia and risk of adverse pregnancy outcome.** *Reprod Sci* 2008, **15**(4):374-381.



1  
2  
3  
4  
5  
6  
7 **Figure legends**  
8

9  
10 **Figure 1.** Percentage of NICUs (n=161) in Germany, France Italy and the United Kingdom compliant  
11 to guidelines for parenteral nutrition in preterm infants. NICUs were considered compliant to  
12 guidelines if: for amino acids, initiation = day of birth, initiation dose  $\geq 1.5$  g/kg/d, target dose = 3 to 4  
13 g/kg/d; for glucose, initiation dose  $\geq 7$  g/kg/d, target dose = 10 to 17 g/kg/d; for lipids, initiation  $\leq$  day  
14 3 of life, initiation dose  $\geq 1$  g/kg/d, target dose = 3 to 4 g/kg/d; energy, target dose = 110 to 120  
15 kcal/kg/d.  
16  
17  
18  
19  
20  
21

Formatted: Font: Bold

22  
23  
24  
25 **Figure 21.** Use of international clinical practice recommendations to guide neonatal parenteral  
26 nutrition by country.  
27  
28

29  
30  
31 **Figure 32.** Justification for non-implementation of international clinical practice guidelines by  
32 country.  
33  
34  
35  
36  
37  
38  
39  
40  
41  
42  
43  
44  
45  
46  
47  
48  
49  
50  
51  
52  
53  
54

**Tables****Table 1.** International recommendations for parenteral nutrition in preterm infants.

|                        | Tsang et al., 2005[9]                                                             | ESPEN/ESPGHAN/ESPR guidelines, 2005[8]        |
|------------------------|-----------------------------------------------------------------------------------|-----------------------------------------------|
| Amino acids            |                                                                                   |                                               |
| initiation             | 1 <sup>st</sup> -day of <del>life</del> birth                                     | 1 <sup>st</sup> -day of <del>life</del> birth |
| initial dose, g/kg/d   | 2                                                                                 | ≥1.5                                          |
| target dose, g/kg/d    | 3.5-4 (ELBW)<br>3.2-3.8 (VLBW)                                                    | maximum 4                                     |
| Glucose                |                                                                                   |                                               |
| initiation             | 1 <sup>st</sup> -day of <del>life</del> birth                                     | 1 <sup>st</sup> -day of <del>life</del> birth |
| initial dose, g/kg/d   | 7                                                                                 | 5.8-11.5                                      |
| target dose, g/kg/d    | 13-17 (ELBW)<br>9.7-15 (VLBW)                                                     | --                                            |
| Lipids                 |                                                                                   |                                               |
| initiation             | 1 <sup>st</sup> -day of <del>life</del> birth (VLBW)<br>Cautious support for ELBW | No later than 3 <sup>rd</sup> day             |
| initial dose, g/kg/d   | ≥1                                                                                | Linoleic acid >0.25 <u>mg/kg/d</u>            |
| target dose, g/kg/d    | 3-4                                                                               | 3-4                                           |
| Energy                 |                                                                                   |                                               |
| caloric target, g/kg/d | 105-115 (ELBW)<br>90-100 (VLBW)                                                   | 110-120                                       |

VLBW: very low birth weight infants; ELBW: extremely low birth weight infants; --, no recommendation provided  
 ESPEN/ESPGHAN/ESPR, European Society for Clinical Nutrition and Metabolism, European Society of Paediatric Gastroenterology, Hepatology and Nutrition, European Society of Paediatric Research

Table 2. Characteristics of participating NICUs.

| Characteristic                                              | TOTAL                                    | Germany                            | UK                                      | France                                  | Italy                                 |
|-------------------------------------------------------------|------------------------------------------|------------------------------------|-----------------------------------------|-----------------------------------------|---------------------------------------|
| Questionnaires received, n                                  | 199                                      | 55                                 | 45                                      | 49                                      | 50                                    |
| Questionnaires analyzed, n                                  | 161                                      | 54                                 | 39                                      | 49                                      | 19                                    |
| Type of hospital, n (%)                                     |                                          |                                    |                                         |                                         |                                       |
| University/teaching hospital                                | 106 (66)                                 | 44 (82)                            | 27 (69)                                 | 31 (63)                                 | 4 (21)                                |
| Non-university                                              | 55 (34)                                  | 10 (19)                            | 12 (31)                                 | 18 (37)                                 | 15 (79)                               |
| <del>Bed capacity</del> Highest acuity beds per unit, n (%) |                                          |                                    |                                         |                                         |                                       |
| 1-5                                                         | 19 (12)                                  | 2 (4)                              | 8 (21)                                  | 3 (6)                                   | 6 (32)                                |
| 6-10                                                        | 73 (45)                                  | 22 (41)                            | 21 (54)                                 | 23 (47)                                 | 7 (37)                                |
| 11-15                                                       | 45 (28)                                  | 18 (33)                            | 5 (13)                                  | 19 (39)                                 | 3 (16)                                |
| ≥16                                                         | 24 (15)                                  | 12 (22)                            | 5 (13)                                  | 4 (8)                                   | 3 (16)                                |
| Intermediate care beds per unit, n (%)                      |                                          |                                    |                                         |                                         |                                       |
| 1-5                                                         | 30 (19)                                  | 13 (24)                            | 5 (13)                                  | 4 (8)                                   | 8 (42)                                |
| 6-10                                                        | 56 (35)                                  | 16 (30)                            | 15 (39)                                 | 17 (35)                                 | 8 (42)                                |
| 11-15                                                       | 33 (21)                                  | 9 (17)                             | 6 (15)                                  | 15 (31)                                 | 3 (16)                                |
| ≥16                                                         | 38 (24)                                  | 14 (26)                            | 13 (33)                                 | 11 (22)                                 | 6 (12)                                |
| NR                                                          | 4 (3)                                    | 2 (4)                              | 0 (0)                                   | 2 (4)                                   | 0 (0)                                 |
| VLBW infants per year, median (IQR)                         | <del>90.0 (129.00-160.00)</del><br>60.00 | <del>64 (86.25-105)</del><br>40.00 | <del>105 (160.00-195.00)</del><br>80.00 | <del>125 (195.00-250.00)</del><br>98.00 | <del>75 (90.00-105.00)</del><br>55.00 |

Formatted: Font: 11 pt

Formatted: Font: 11 pt

NR, no response  
VLBW, very low birth weight  
 IQR, interquartile range

(Percentages do not necessarily sum up to 100% due to rounding)

**Table 3.** Guideline awareness by country.

| Question                                                                                                                 | TOTAL<br>n (%) | Germany<br>n (%) | UK<br>n (%) | France<br>n (%) | Italy<br>n (%) |
|--------------------------------------------------------------------------------------------------------------------------|----------------|------------------|-------------|-----------------|----------------|
| <b>Are you aware of guidelines for use of neonatal / pediatric parenteral nutrition? (asymptotic significance 0.073)</b> |                |                  |             |                 |                |
| Yes                                                                                                                      | 128 (80)       | 47 (87)          | 33 (85)     | 33 (67)         | 15 (79)        |
| No                                                                                                                       | 33 (21)        | 7 (13)           | 6 (15)      | 16 (33)         | 4 (21)         |
| <b>Of which guidelines are you aware?*</b>                                                                               |                |                  |             |                 |                |
| International[8, 21]                                                                                                     | 33 (26)        | 10 (21)          | 9 (27)      | 10 (30)         | 4 (27)         |
| National                                                                                                                 | 24 (19)        | 16 (34)          | 2 (6)       | 0 (0)           | 6 (40)         |
| In-house guidelines                                                                                                      | 8 (6)          | 4 (9)            | 2 (6)       | 0 (0)           | 2 (13)         |
| None specifically named/other                                                                                            | 66 (52)        | 19 (40)          | 17 (52)     | 24 (73)         | 6 (40)         |

\*More than one answer per questionnaire possible.

(Percentages do not necessarily sum up to 100% due to rounding)

Formatted: Justified

Formatted: Justified

Formatted: Justified

Formatted: Justified

Formatted: Indent: Left: 0"

Formatted: Justified

Formatted: Normal, Left, No bullets or numbering

Table 34. Current practice for parenteral nutrition in NICU patients [by country](#).

| Nutrient                         | TOTAL<br>n (%)  | Germany<br>n (%) | UK<br>n (%)    | France<br>n (%)   | Italy<br>n (%) |
|----------------------------------|-----------------|------------------|----------------|-------------------|----------------|
| Amino acids                      |                 |                  |                |                   |                |
| Initiation (p=0.005)             |                 |                  |                |                   |                |
| <b>D0</b>                        | <b>101 (63)</b> | <b>32 (59)</b>   | <b>21 (54)</b> | <b>41 (84)</b>    | <b>7 (37)</b>  |
| D1                               | 51 (32)         | 19 (35)          | 15 (39)        | 8 (16)            | 9 (47)         |
| D2 or later                      | 9 (6)           | 3 (6)            | 3 (8)          | 0 (0)             | 3 (16)         |
| Initial dose (p=0.001)           |                 |                  |                |                   |                |
| 0.5 g/kg/d                       | 44 (27)         | 20 (37)          | 11 (28)        | 5 (10)            | 8 (42)         |
| 1.0 g/kg/d                       | 53 (33)         | 14 (26)          | 9 (23)         | 24 (49)           | 6 (32)         |
| <b>1.5 g/kg/d</b>                | <b>34 (21)</b>  | <b>5 (9)</b>     | <b>11 (28)</b> | <b>15 (31)</b>    | <b>3 (16)</b>  |
| <b>2 g/kg/d or higher</b>        | <b>27 (17)</b>  | <b>15 (28)</b>   | <b>5 (13)</b>  | <b>5 (10)</b>     | <b>2 (11)</b>  |
| Do not know                      | 3 (2)           | 0 (0)            | 3 (8)          | 0 (0)             | 0 (0)          |
| Target dose (p<0.001)            |                 |                  |                |                   |                |
| 1 or 2 g/kg/d                    | 11 (7)          | 6 (11)           | 3 (8)          | 0 (0)             | 2 (11)         |
| <b>3 or 4 g/kg/d</b>             | <b>146 (91)</b> | <b>48 (89)</b>   | <b>34 (87)</b> | <b>49 (100.0)</b> | <b>15 (79)</b> |
| 5 g/kg/d or higher / Do not know | 4 (3)           | 0 (0)            | 2 (5)          | 0 (0)             | 2 (11)         |
| Glucose                          |                 |                  |                |                   |                |
| Initial dose (p<0.001)           |                 |                  |                |                   |                |
| 6 g/kg/d                         | 73 (45)         | 27 (50)          | 12 (31)        | 19 (39)           | 15 (79)        |
| <b>7 g/kg/d</b>                  | <b>41 (26)</b>  | <b>18 (33)</b>   | <b>3 (8)</b>   | <b>18 (37)</b>    | <b>2 (11)</b>  |
| <b>8 g/kg/d</b>                  | <b>28 (17)</b>  | <b>6 (11)</b>    | <b>9 (23)</b>  | <b>12 (25)</b>    | <b>1 (5)</b>   |
| <b>9 g/kg/d or higher</b>        | <b>17 (11)</b>  | <b>3 (6)</b>     | <b>13 (33)</b> | <b>0 (0)</b>      | <b>1 (5)</b>   |
| Do not know                      | 2 (1)           | 0 (0)            | 2 (5)          | 0 (0)             | 0 (0)          |
| Target dose (p<0.001)            |                 |                  |                |                   |                |
| <b>15 g/kg/d</b>                 | <b>68 (42)</b>  | <b>22 (41)</b>   | <b>21 (54)</b> | <b>8 (16)</b>     | <b>17 (90)</b> |

1  
2  
3  
4  
5  
6  
7  
8  
9  
10  
11  
12  
13  
14  
15  
16  
17  
18  
19  
20  
21  
22  
23  
24  
25  
26  
27  
28  
29  
30  
31  
32  
33  
34  
35  
36  
37  
38  
39  
40  
41  
42  
43  
44  
45  
46  
47  
48  
49

|                                                       |                 |                |                |                |                |                       |
|-------------------------------------------------------|-----------------|----------------|----------------|----------------|----------------|-----------------------|
| <b>16 g/kg/d</b>                                      | <b>38 (24)</b>  | <b>14 (26)</b> | <b>5 (13)</b>  | <b>18 (37)</b> | <b>1 (5)</b>   | Formatted: Font: Bold |
| <b>17 g/kg/d</b>                                      | <b>12 (8)</b>   | <b>5 (9)</b>   | <b>2 (5)</b>   | <b>5 (10)</b>  | <b>0 (0)</b>   | Formatted: Font: Bold |
| 18 g/kg/d or higher                                   | 32 (20)         | 10 (19)        | 3 (8)          | 18 (37)        | 1 (5)          |                       |
| Do not know                                           | 11 (7)          | 3 (6)          | 8 (21)         | 0 (0)          | 0 (0)          |                       |
| <b>Lipids</b>                                         |                 |                |                |                |                |                       |
| Initiation (p=0.160)                                  |                 |                |                |                |                |                       |
| <b>D0</b>                                             | <b>32 (20)</b>  | <b>12 (22)</b> | <b>12 (31)</b> | <b>3 (6)</b>   | <b>5 (26)</b>  | Formatted: Font: Bold |
| <b>D1</b>                                             | <b>77 (48)</b>  | <b>24 (44)</b> | <b>17 (44)</b> | <b>28 (57)</b> | <b>8 (42)</b>  | Formatted: Font: Bold |
| <b>D2</b>                                             | <b>36 (22)</b>  | <b>11 (20)</b> | <b>9 (23)</b>  | <b>11 (22)</b> | <b>5 (26)</b>  | Formatted: Font: Bold |
| D3 or later                                           | 16 (10)         | 7 (13)         | 1 (3)          | 7 (14)         | 1 (5)          |                       |
| Do not know                                           | 0 (0)           | 0 (0)          | 0 (0)          | 0 (0)          | 0 (0)          |                       |
| Initial dose (p<0.001)                                |                 |                |                |                |                |                       |
| 0.5 g/kg/d                                            | 98 (61)         | 34 (63)        | 11 (28)        | 36 (74)        | 17 (90)        |                       |
| <b>1.0 g/kg/d</b>                                     | <b>59 (37)</b>  | <b>18 (33)</b> | <b>27 (70)</b> | <b>13 (27)</b> | <b>1 (5)</b>   | Formatted: Font: Bold |
| <b>1.5 g/kg/d or higher</b>                           | <b>3 (2)</b>    | <b>2 (4)</b>   | <b>0 (0)</b>   | <b>0 (0)</b>   | <b>1 (5)</b>   | Formatted: Font: Bold |
| Do not know                                           | 1 (1)           | 0 (0)          | 1 (3)          | 0 (0)          | 0 (0)          |                       |
| Target dose (p= 0.028)                                |                 |                |                |                |                |                       |
| 1 or 2 g/kg/d                                         | 34 (21)         | 15 (28)        | 3 (8)          | 9 (18)         | 7 (37)         |                       |
| <b>3 or 4 g/kg/d</b>                                  | <b>123 (76)</b> | <b>38 (70)</b> | <b>33 (85)</b> | <b>40 (82)</b> | <b>12 (63)</b> | Formatted: Font: Bold |
| 5 g/kg/d or higher / Do not know                      | 4 (3)           | 1 (2)          | 3 (8)          | 0 (0)          | 0 (0)          |                       |
| <b>Caloric target (p&lt;0.001)</b>                    |                 |                |                |                |                |                       |
| 90 or 100 kcal/kg/d                                   | 29 (18)         | 3 (6)          | 15 (39)        | 3 (6)          | 8 (42)         |                       |
| <b>110 kcal/kg/d</b>                                  | <b>28 (17)</b>  | <b>8 (15)</b>  | <b>6 (15)</b>  | <b>11 (22)</b> | <b>3 (16)</b>  | Formatted: Font: Bold |
| <b>120 kcal/kg/d</b>                                  | <b>65 (40)</b>  | <b>25 (46)</b> | <b>10 (26)</b> | <b>26 (53)</b> | <b>4 (21)</b>  | Formatted: Font: Bold |
| 130 or more                                           | 35 (22)         | 18 (33)        | 4 (10)         | 9 (18)         | 4 (21)         |                       |
| Do not know                                           | 4 (3)           | 0 (0)          | 4 (10)         | 0 (0)          | 0 (0)          |                       |
| <b>Maximal caloric intake prescribed (p&lt;0.001)</b> |                 |                |                |                |                |                       |
| 110 kcal/kg/d                                         | 13 (8)          | 1 (2)          | 7 (18)         | 3 (6)          | 2 (11)         |                       |

1  
2  
3  
4  
5  
6  
7  
8  
9  
10  
11  
12  
13  
14  
15  
16  
17  
18  
19  
20  
21  
22  
23  
24  
25  
26  
27  
28  
29  
30  
31  
32  
33  
34  
35  
36  
37  
38  
39  
40  
41  
42  
43  
44  
45  
46  
47  
48  
49

|                       |         |         |         |         |        |
|-----------------------|---------|---------|---------|---------|--------|
| 120 kcal/kg/d         | 36 (22) | 9 (17)  | 12 (31) | 9 (18)  | 6 (32) |
| 130 kcal/kg/d         | 32 (20) | 10 (19) | 4 (10)  | 12 (25) | 6 (32) |
| 140 kcal/kg/d         | 37 (23) | 16 (30) | 2 (5)   | 18 (37) | 1 (5)  |
| 150 kcal/kg/d or more | 34 (21) | 18 (33) | 6 (15)  | 6 (12)  | 4 (21) |
| Do not know           | 9 (6)   | 0 (0)   | 8 (21)  | 1 (2)   | 0 (0)  |

D0, D1, D2; day 0, day 1, day 2

(Percentages do not necessarily sum up to 100% due to rounding)

Recommended intakes as defined in the methods section are highlighted in bold

For Peer review only

**Table 4.** Guideline awareness by country.

| <b>Question</b>                                                                          | <b>TOTAL</b><br>n (%) | <b>Germany</b><br>n (%) | <b>UK</b><br>n (%) | <b>France</b><br>n (%) | <b>Italy</b><br>n (%) |
|------------------------------------------------------------------------------------------|-----------------------|-------------------------|--------------------|------------------------|-----------------------|
| <b>Are you aware of guidelines for use of neonatal / pediatric parenteral nutrition?</b> |                       |                         |                    |                        |                       |
| Yes                                                                                      | 128 (80)              | 47 (87)                 | 33 (85)            | 33 (67)                | 15 (79)               |
| No                                                                                       | 33 (21)               | 7 (13)                  | 6 (15)             | 16 (33)                | 4 (21)                |
| <b>Of which guidelines are you aware?*</b>                                               |                       |                         |                    |                        |                       |
| International [8, 21]                                                                    | 33 (26)               | 10 (21)                 | 9 (27)             | 10 (30)                | 4 (27)                |
| National                                                                                 | 24 (19)               | 16 (34)                 | 2 (6)              | 0 (0)                  | 6 (40)                |
| In-house guidelines                                                                      | 8 (6)                 | 4 (9)                   | 2 (6)              | 0 (0)                  | 2 (13)                |
| None specifically named/other                                                            | 66 (52)               | 19 (40)                 | 17 (52)            | 24 (73)                | 6 (40)                |

\*More than one answer per questionnaire possible.

(Percentages do not necessarily sum up to 100% due to rounding)
